# Supplementary material for: Tenacibactins K–M, cytotoxic siderophores from a coral-associated gliding bacterium of the genus Tenacibaculum
Source: PubMed Central journal article supplement (PMC8767563; doi:10.3762/bjoc.18.12), 2022-01-13
Supplement: Beilstein_J_Org_Chem-18-110-s001.pdf [file Beilstein_J_Org_Chem-18-110-s001.pdf]

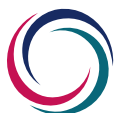

## Supporting Information

for

### **Tenacibactins K–M, cytotoxic siderophores from a coral-associated gliding bacterium of the genus *Tenacibaculum***

Yasuhiro Igarashi, Yiwei Ge, Tao Zhou, Amit Raj Sharma, Enjuro Harunari, Naoya Oku and Agus Trianto

*Beilstein J. Org. Chem.* **2022**, *18*, 110–119. doi:10.3762/bjoc.18.12

### **Copies of UV, IR, MS/MS, and NMR spectra for compounds 1–3**

## Table of contents

**Figure S1:** UV spectrum of tenacibactin K (**1**).

**Figure S2:** IR spectrum of **1**.

**Figure S3:**  $^1\text{H}$  NMR spectrum of **1** (500 MHz, DMSO- $d_6$ , 25 °C).

**Figure S4:**  $^{13}\text{C}$  NMR spectrum of **1** (125 MHz, DMSO- $d_6$ , 25 °C).

**Figure S5:** COSY spectrum of **1** (500 MHz, DMSO- $d_6$ , 25 °C).

**Figure S6:** HSQC spectrum of **1** (500 MHz, DMSO- $d_6$ , 25 °C).

**Figure S7:** HMBC spectrum of **1** (500 MHz, DMSO- $d_6$ , 25 °C).

**Figure S8:** ROESY spectrum of **1** (500 MHz, DMSO- $d_6$ , 25 °C).

**Figure S9:**  $^1\text{H}$  NMR spectrum of **1** (500 MHz,  $\text{CDCl}_3/\text{CD}_3\text{OD}$  3:7, 25 °C).

**Figure S10:**  $^{13}\text{C}$  NMR spectrum of **1** (125 MHz,  $\text{CDCl}_3/\text{CD}_3\text{OD}$  3:7, 25 °C).

**Figure S11:** HMBC spectrum of **1** (500 MHz,  $\text{CDCl}_3/\text{CD}_3\text{OD}$  3:7, 25 °C).

**Figure S12:** UV spectrum of tenacibactin L (**2**).

**Figure S13:** IR spectrum of **2**.

**Figure S14:**  $^1\text{H}$  NMR spectrum of **2** (500 MHz, DMSO- $d_6$ , 25 °C).

**Figure S15:**  $^{13}\text{C}$  NMR spectrum of **2** (125 MHz, DMSO- $d_6$ , 25 °C).

**Figure S16:** COSY spectrum of **2** (500 MHz, DMSO- $d_6$ , 25 °C).

**Figure S17:** HSQC spectrum of **2** (500 MHz, DMSO- $d_6$ , 25 °C).

**Figure S18:** HMBC spectrum of **2** (500 MHz, DMSO- $d_6$ , 25 °C).

**Figure S19:** MS/MS spectrum of **2**.

**Scheme S20:** Fragmentation pathway for **2**.

**Figure S21:** UV spectrum of tenacibactin M (**3**).

**Figure S22:** IR spectrum of **3**.

**Figure S23:**  $^1\text{H}$  NMR spectrum of **3** (500 MHz, DMSO- $d_6$ , 25 °C).

**Figure S24:**  $^{13}\text{C}$  NMR spectrum of **3** (125 MHz, DMSO- $d_6$ , 25 °C).

**Figure S25:** COSY spectrum of **3** (500 MHz, DMSO- $d_6$ , 25 °C).

**Figure S26:** HSQC spectrum of **3** (500 MHz, DMSO- $d_6$ , 25 °C).

**Figure S27:** HMBC spectrum of **3** (500 MHz, DMSO- $d_6$ , 25 °C).

**Figure S28:** MS/MS spectrum of **3**.

**Scheme S29:** Fragmentation pathway for **3**.

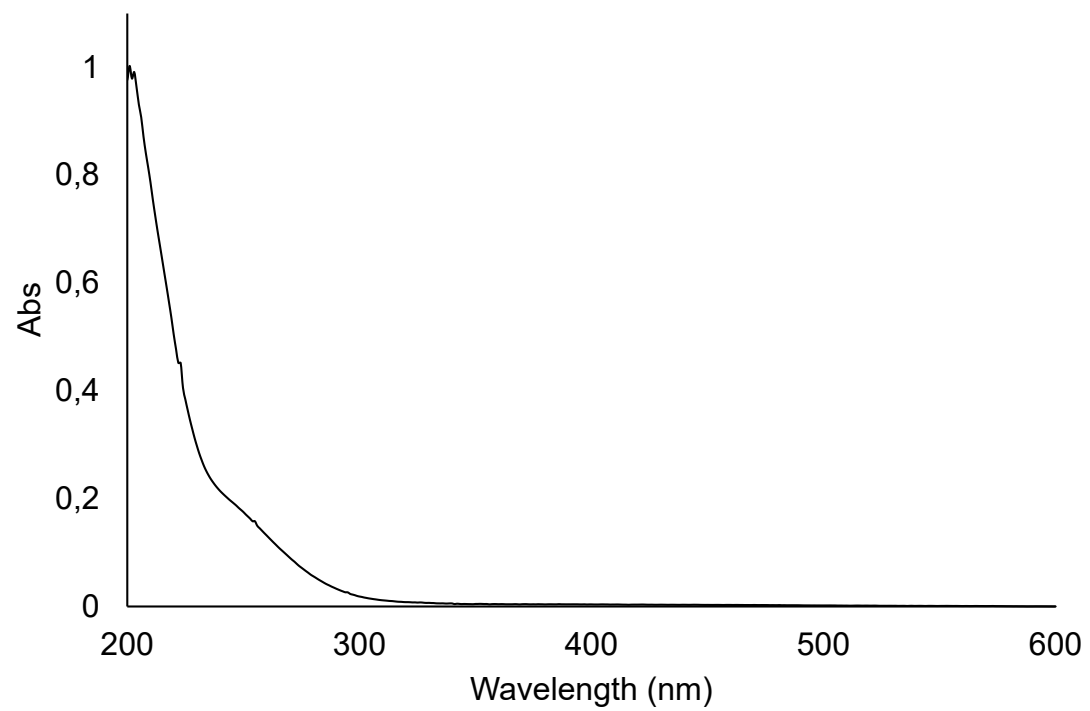

**Figure S1:** UV spectrum of tenacibactin K (1).

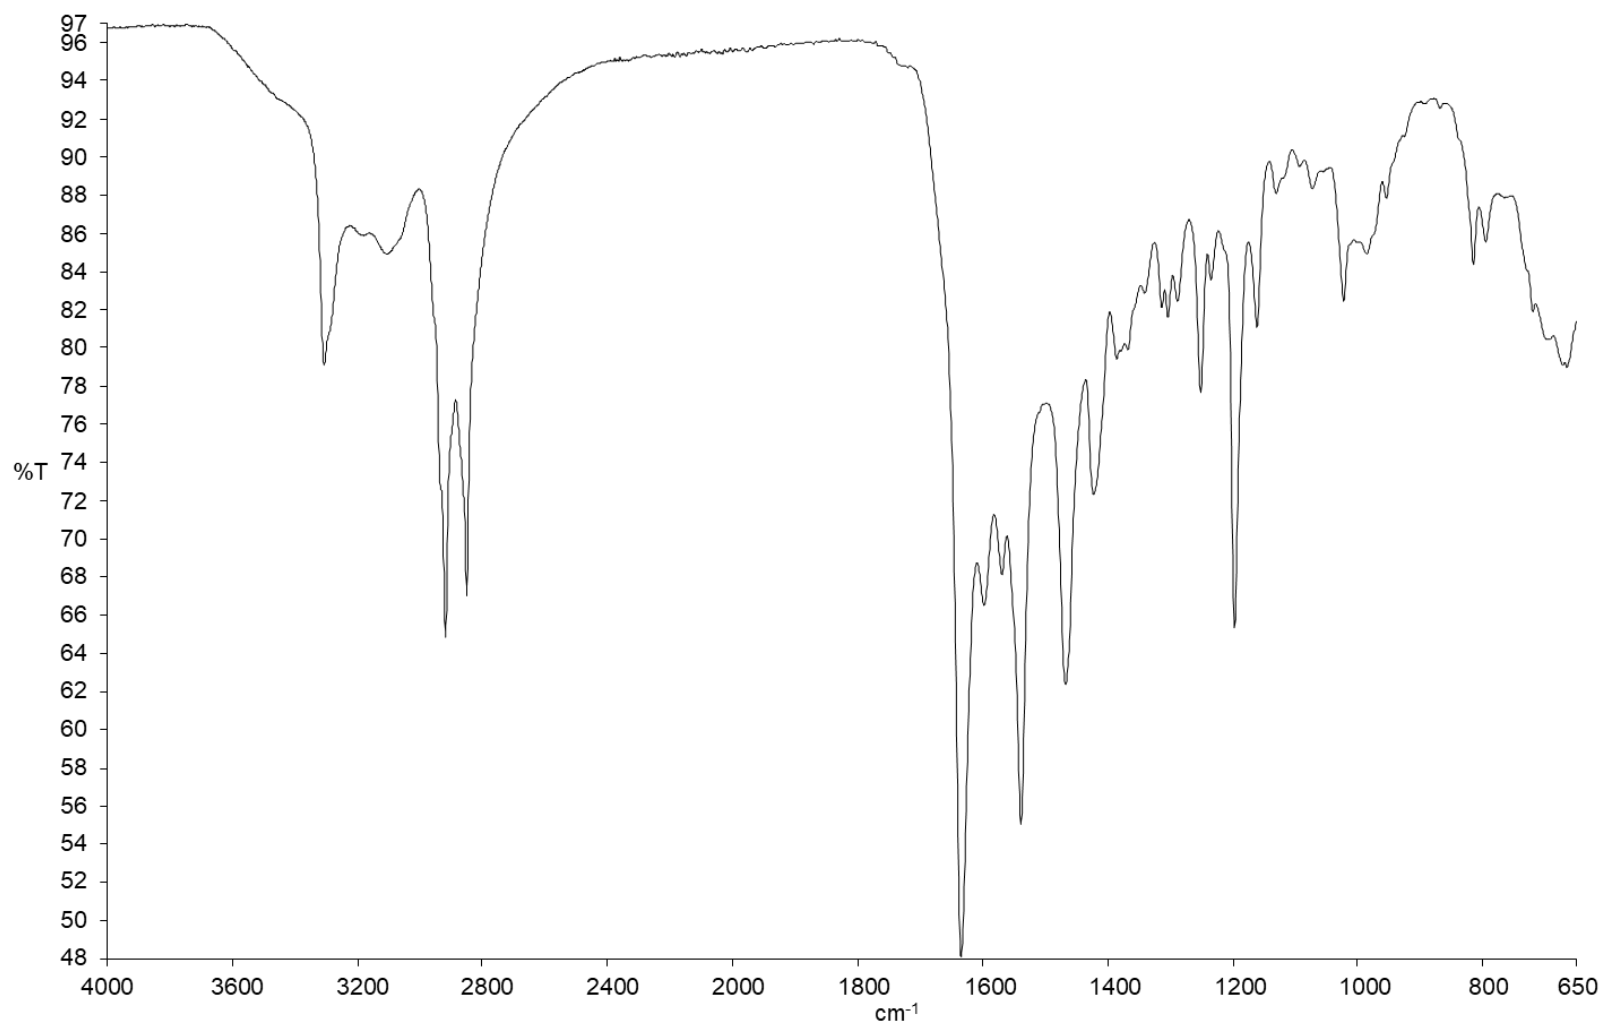

**Figure S2:** IR spectrum of **1**.

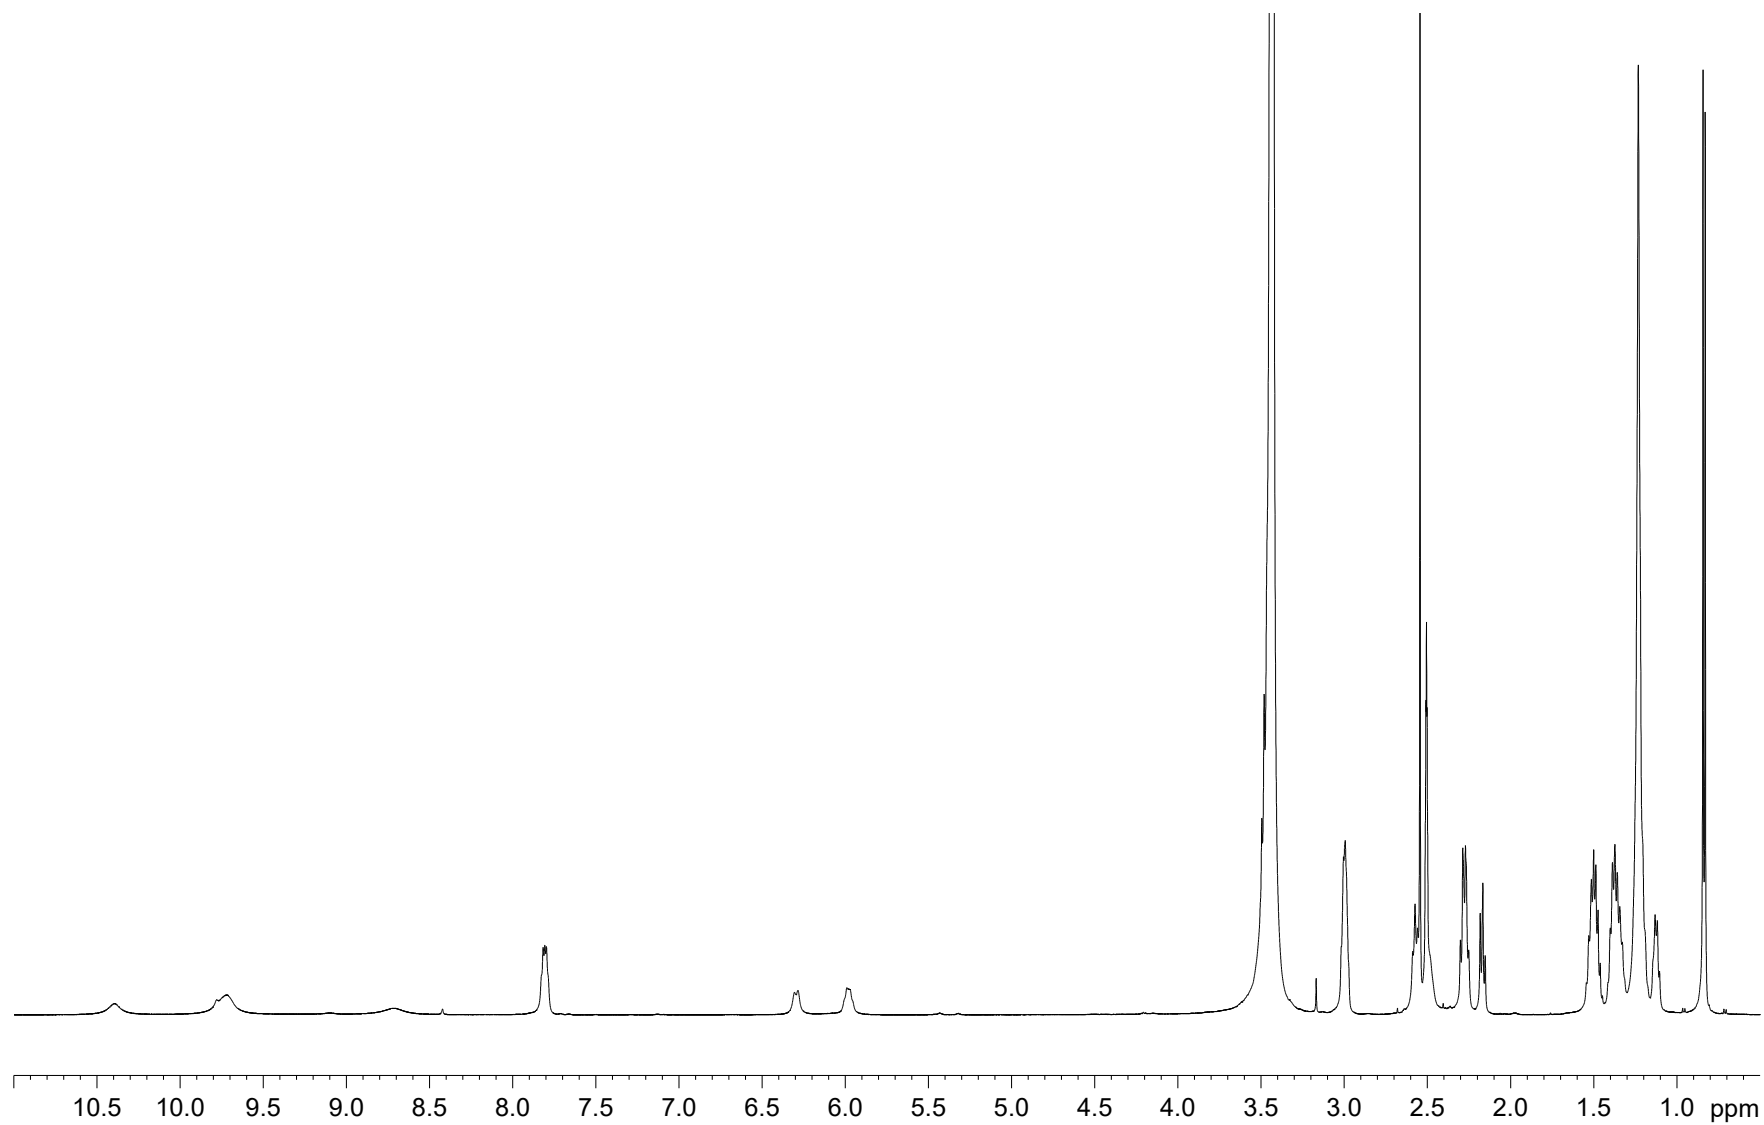

**Figure S3:**  $^1\text{H}$  NMR spectrum of **1** (500 MHz,  $\text{DMSO-}d_6$ ,  $25\text{ }^\circ\text{C}$ ).

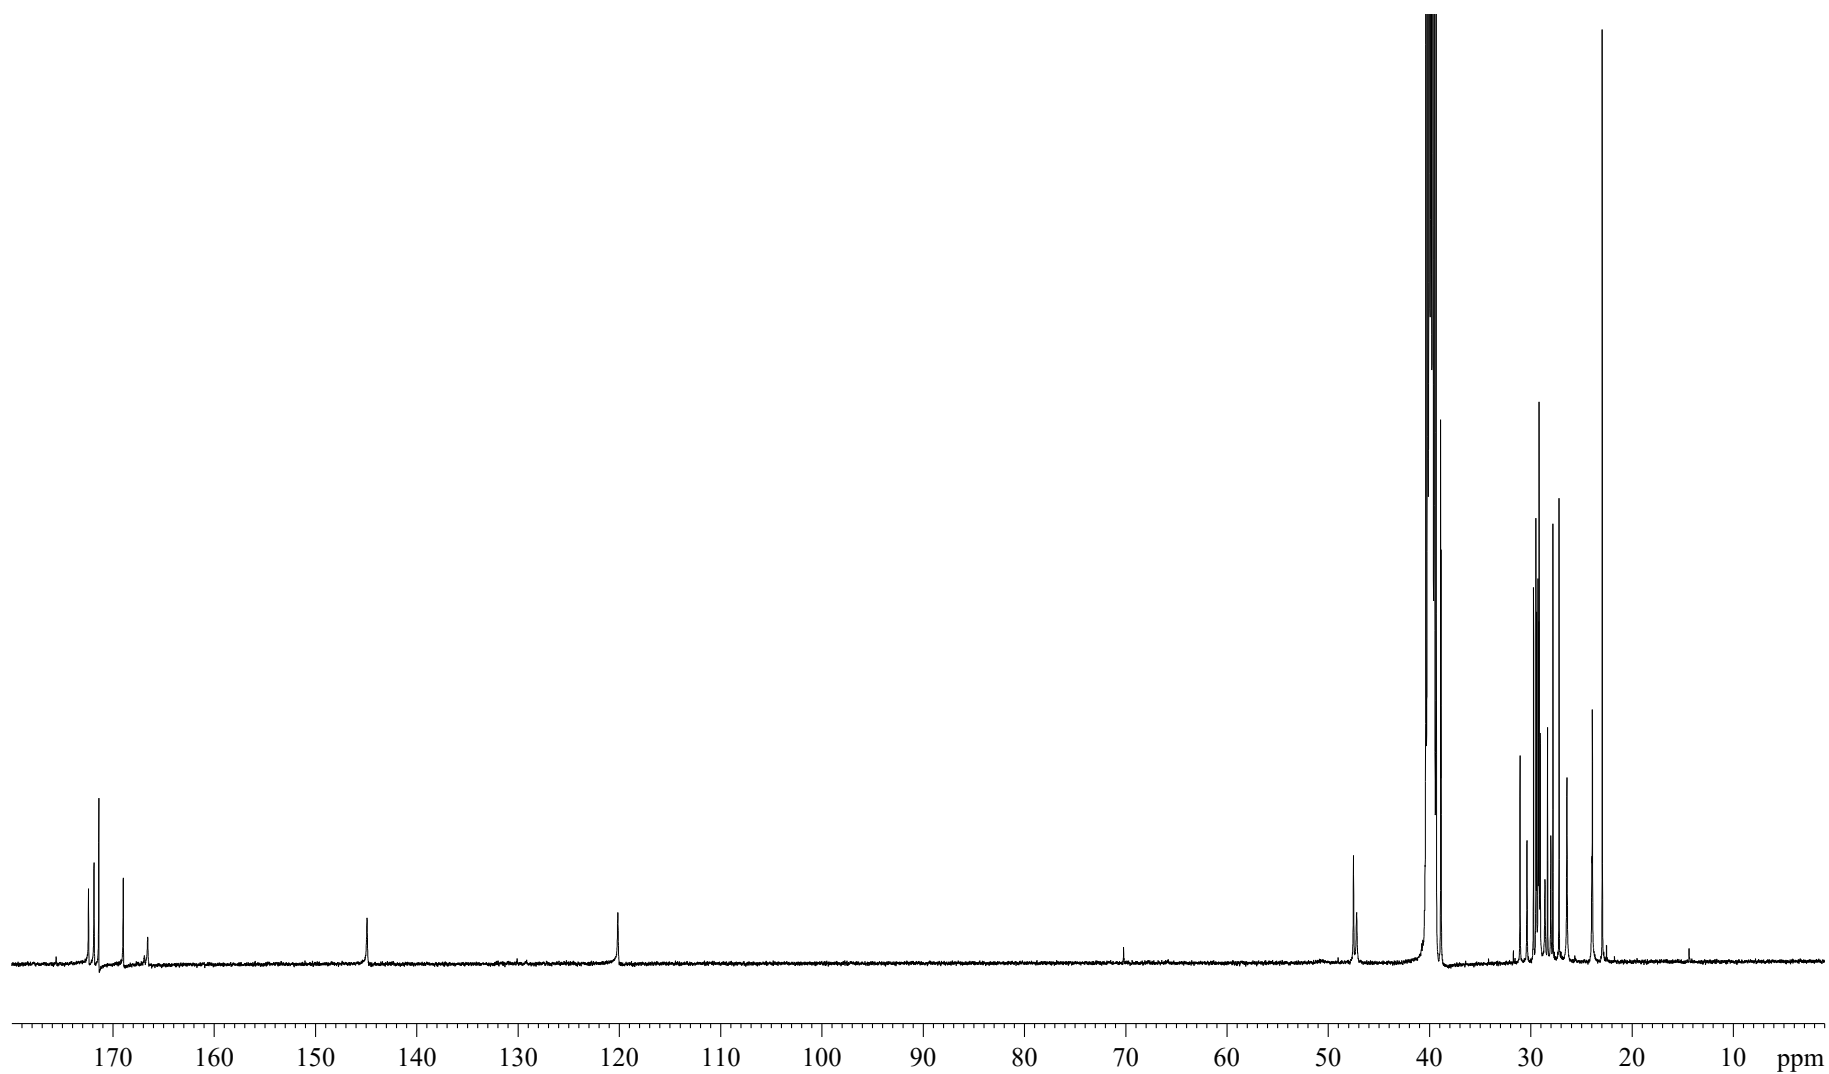

**Figure S4:**  $^{13}\text{C}$  NMR spectrum of **1** (500 MHz,  $\text{DMSO-}d_6$ , 25  $^\circ\text{C}$ ).

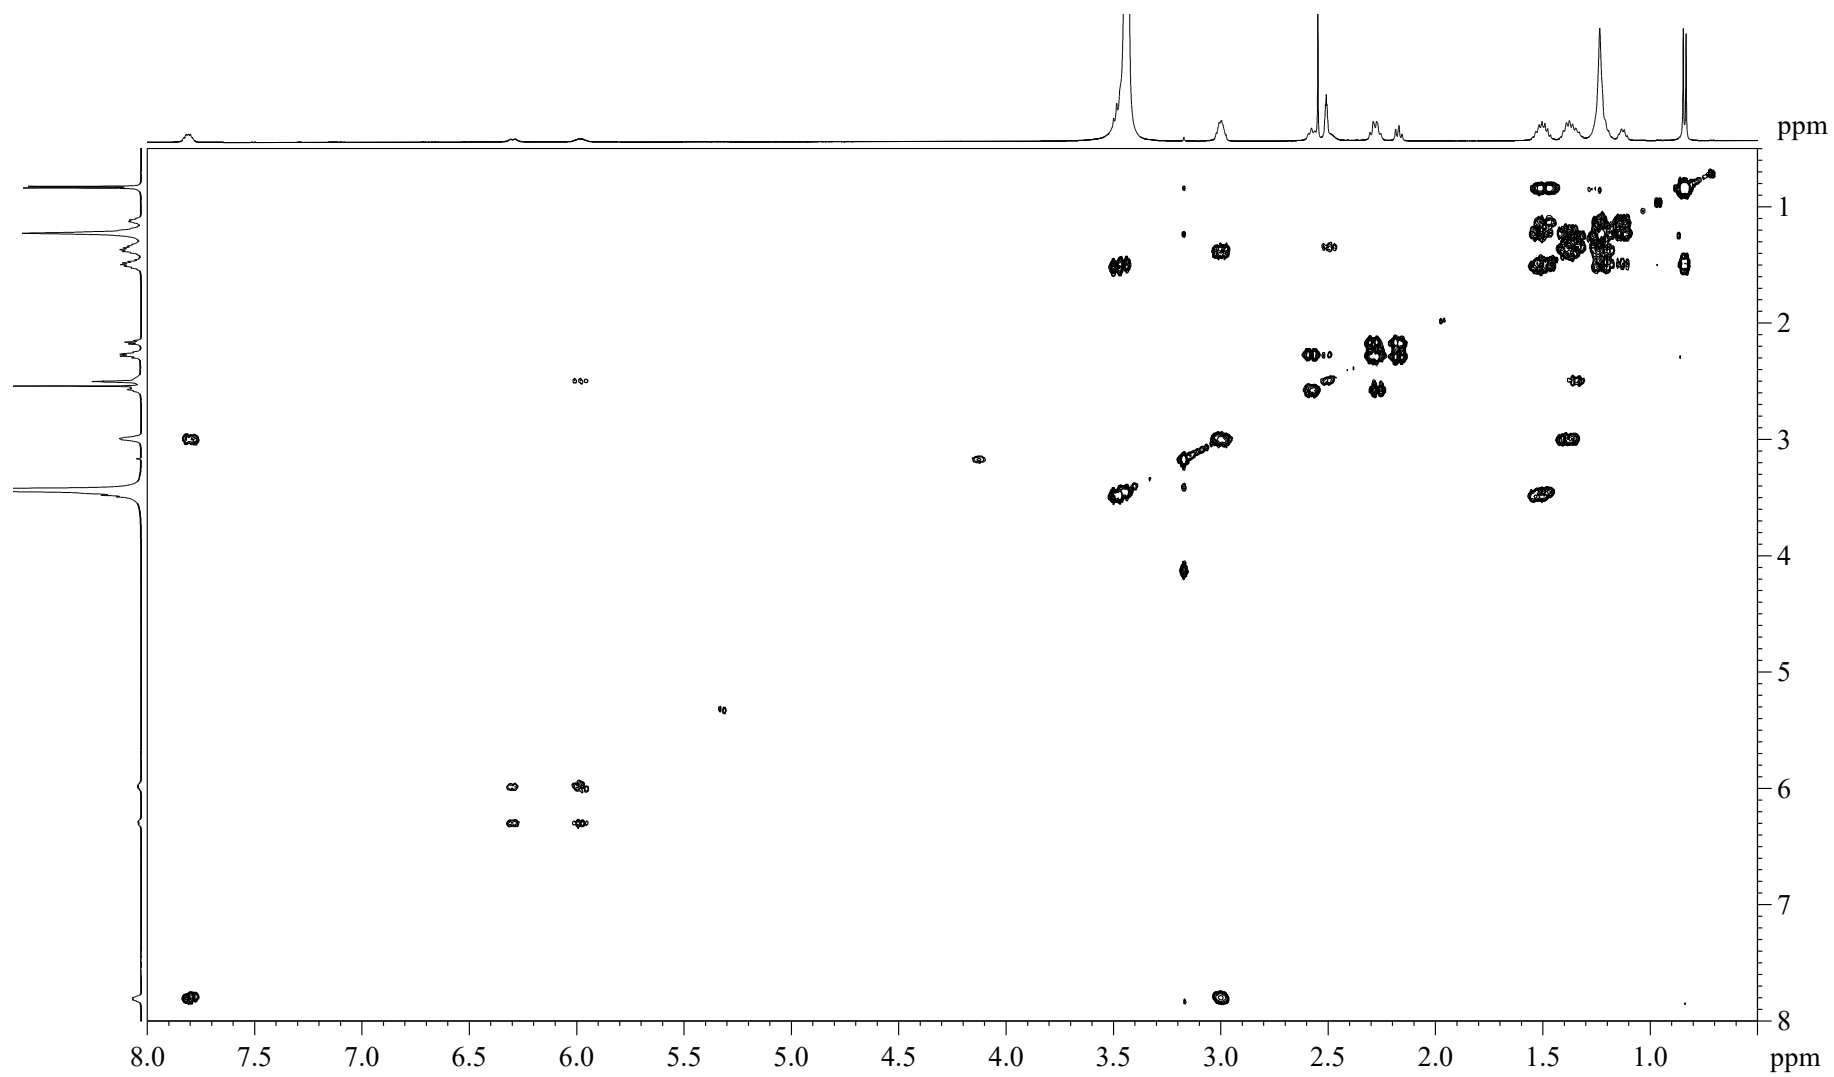

**Figure S5:** COSY spectrum of **1** (500 MHz, DMSO-*d*<sub>6</sub>, 25 °C).

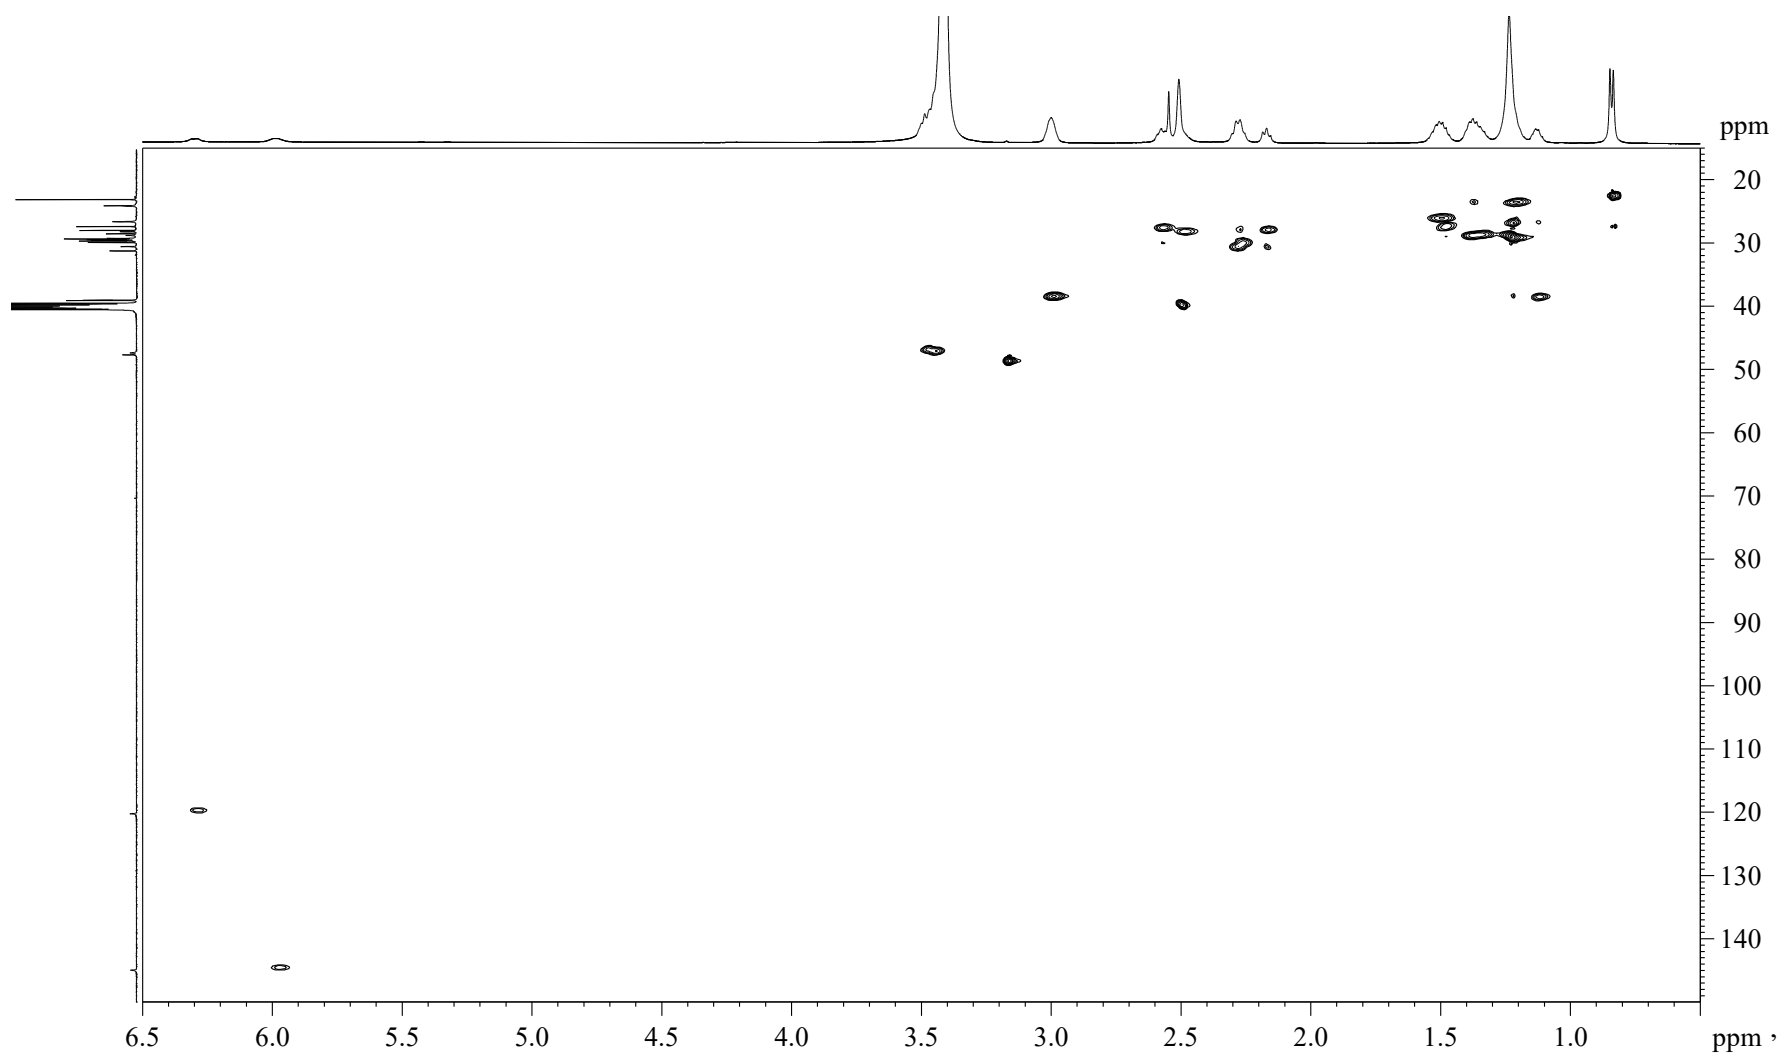

**Figure S6:** HSQC spectrum of **1** (500 MHz,  $\text{DMSO-}d_6$ , 25 °C).



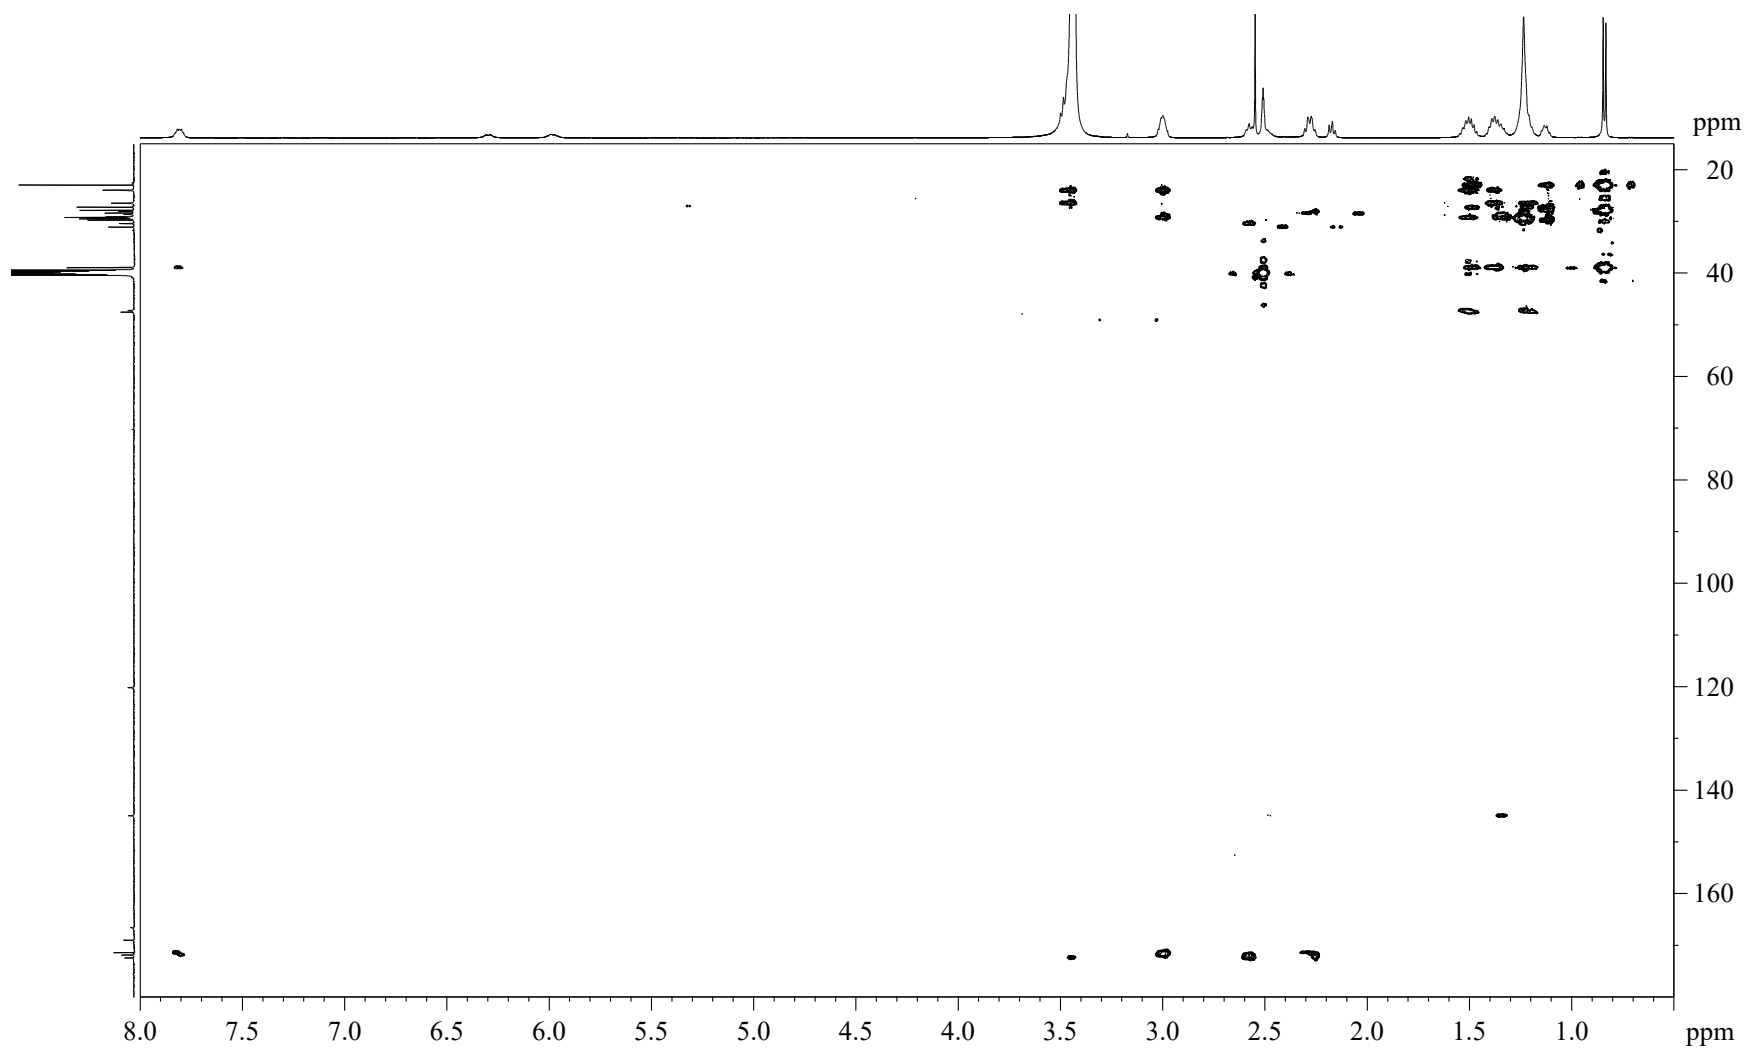

**Figure S7:** HMBC spectrum of **1** (500 MHz, DMSO-*d*<sub>6</sub>, 25 °C).

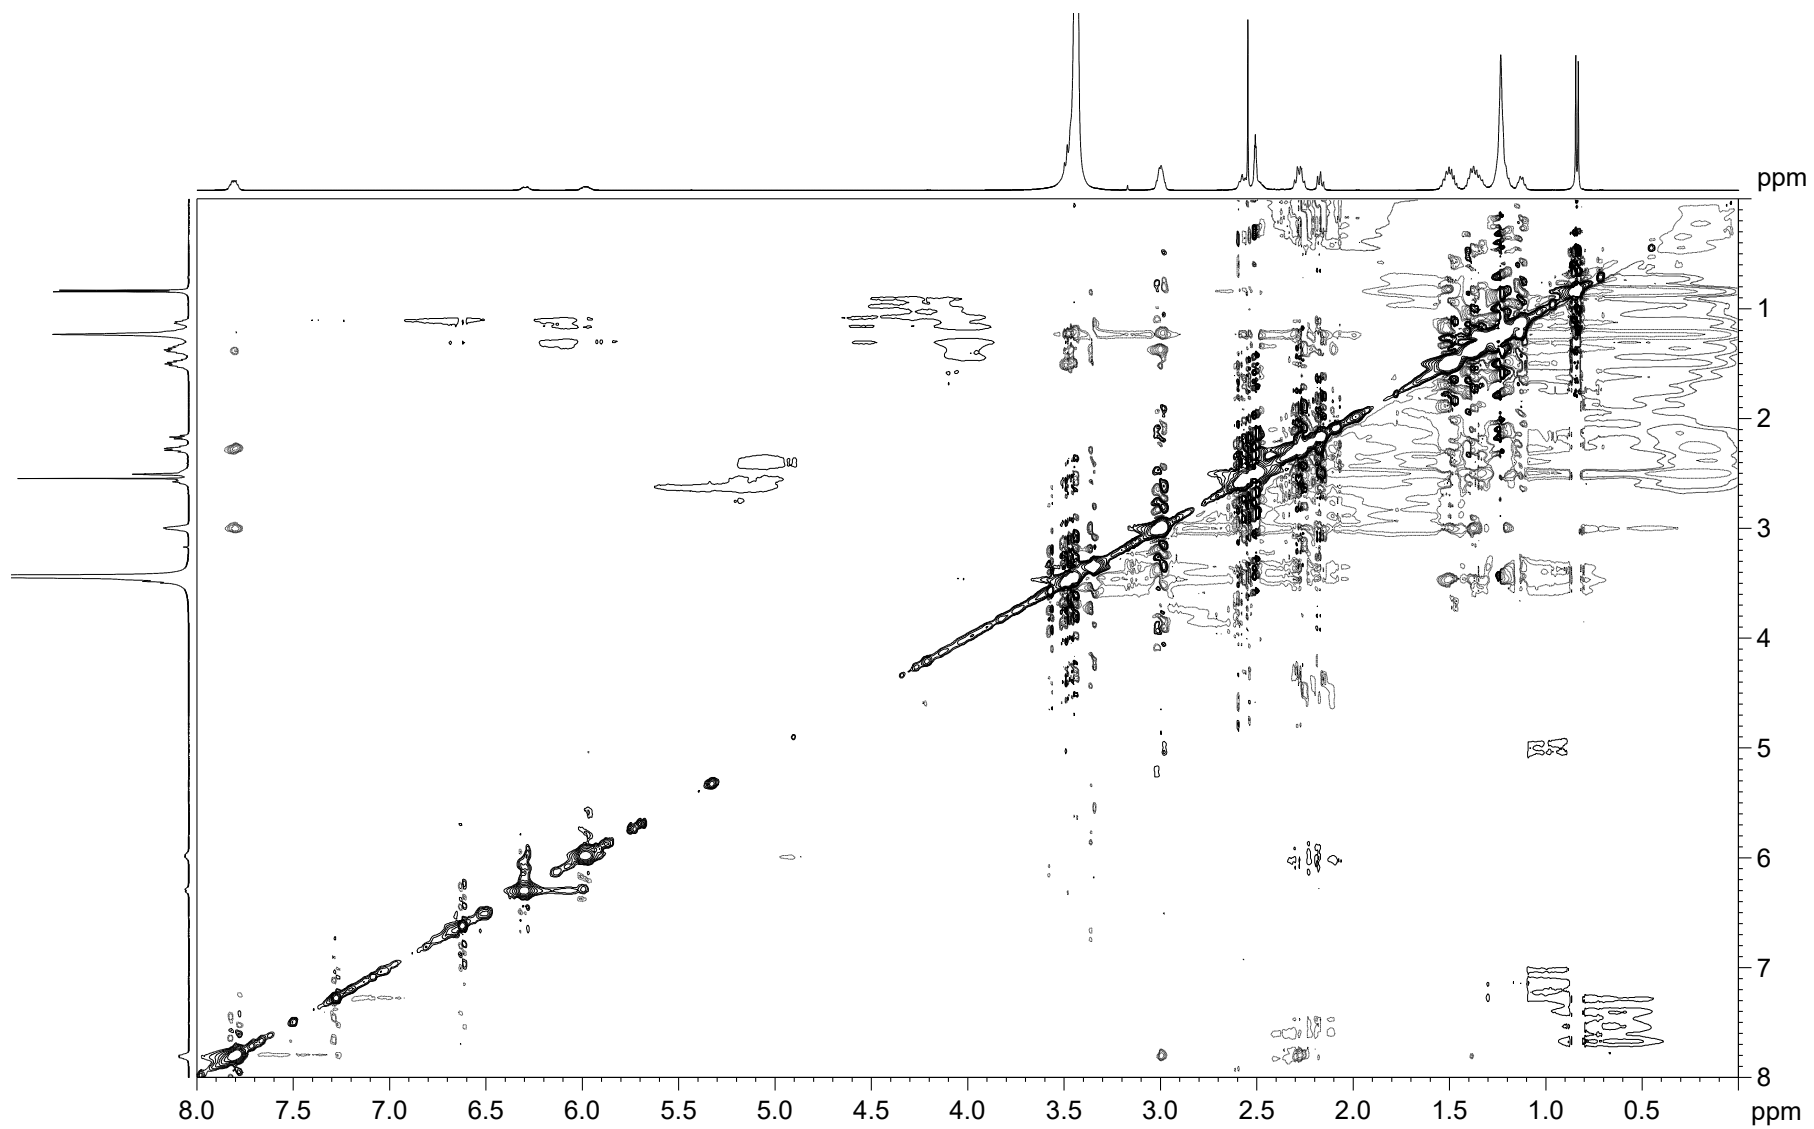

Figure S8: ROESY spectrum of **1** (500 MHz, DMSO-*d*<sub>6</sub>, 25 °C).

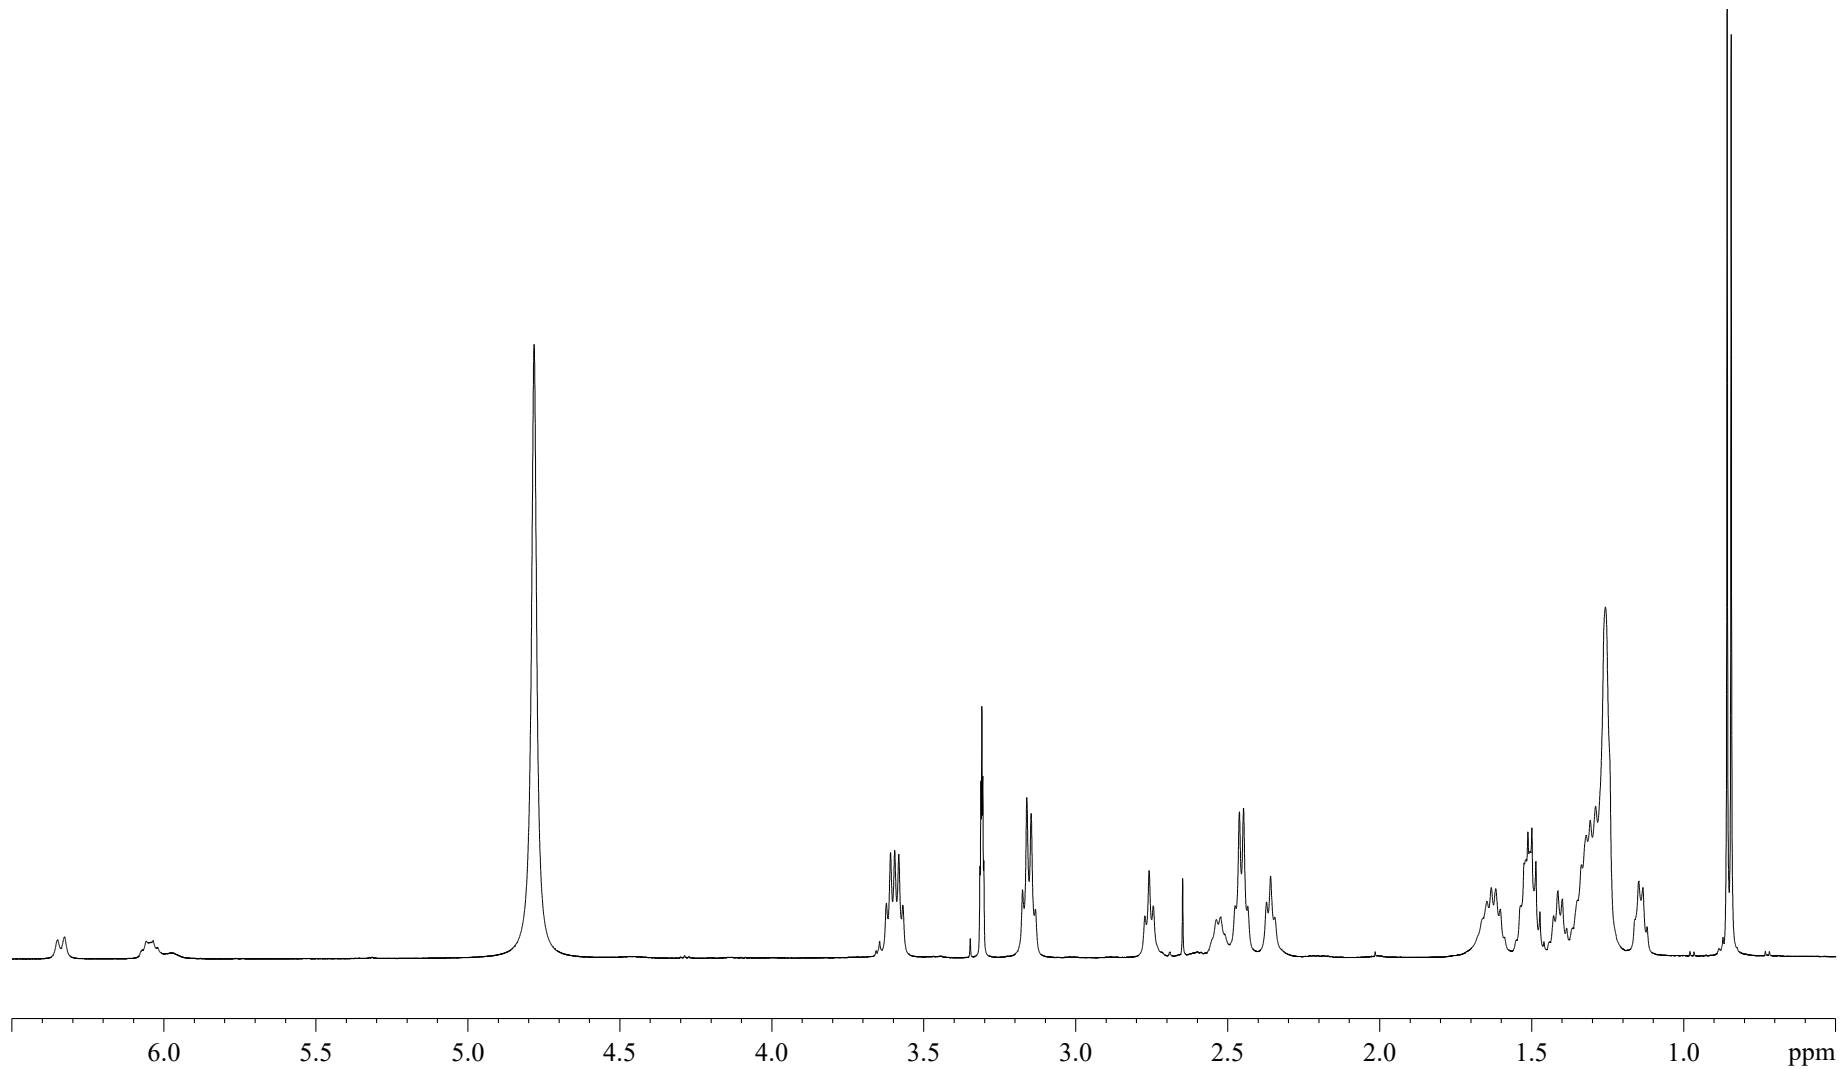

**Figure S9:**  $^1\text{H}$  NMR spectrum of **1** (500 MHz,  $\text{CDCl}_3/\text{CD}_3\text{OD}$  3:7, 25 °C).

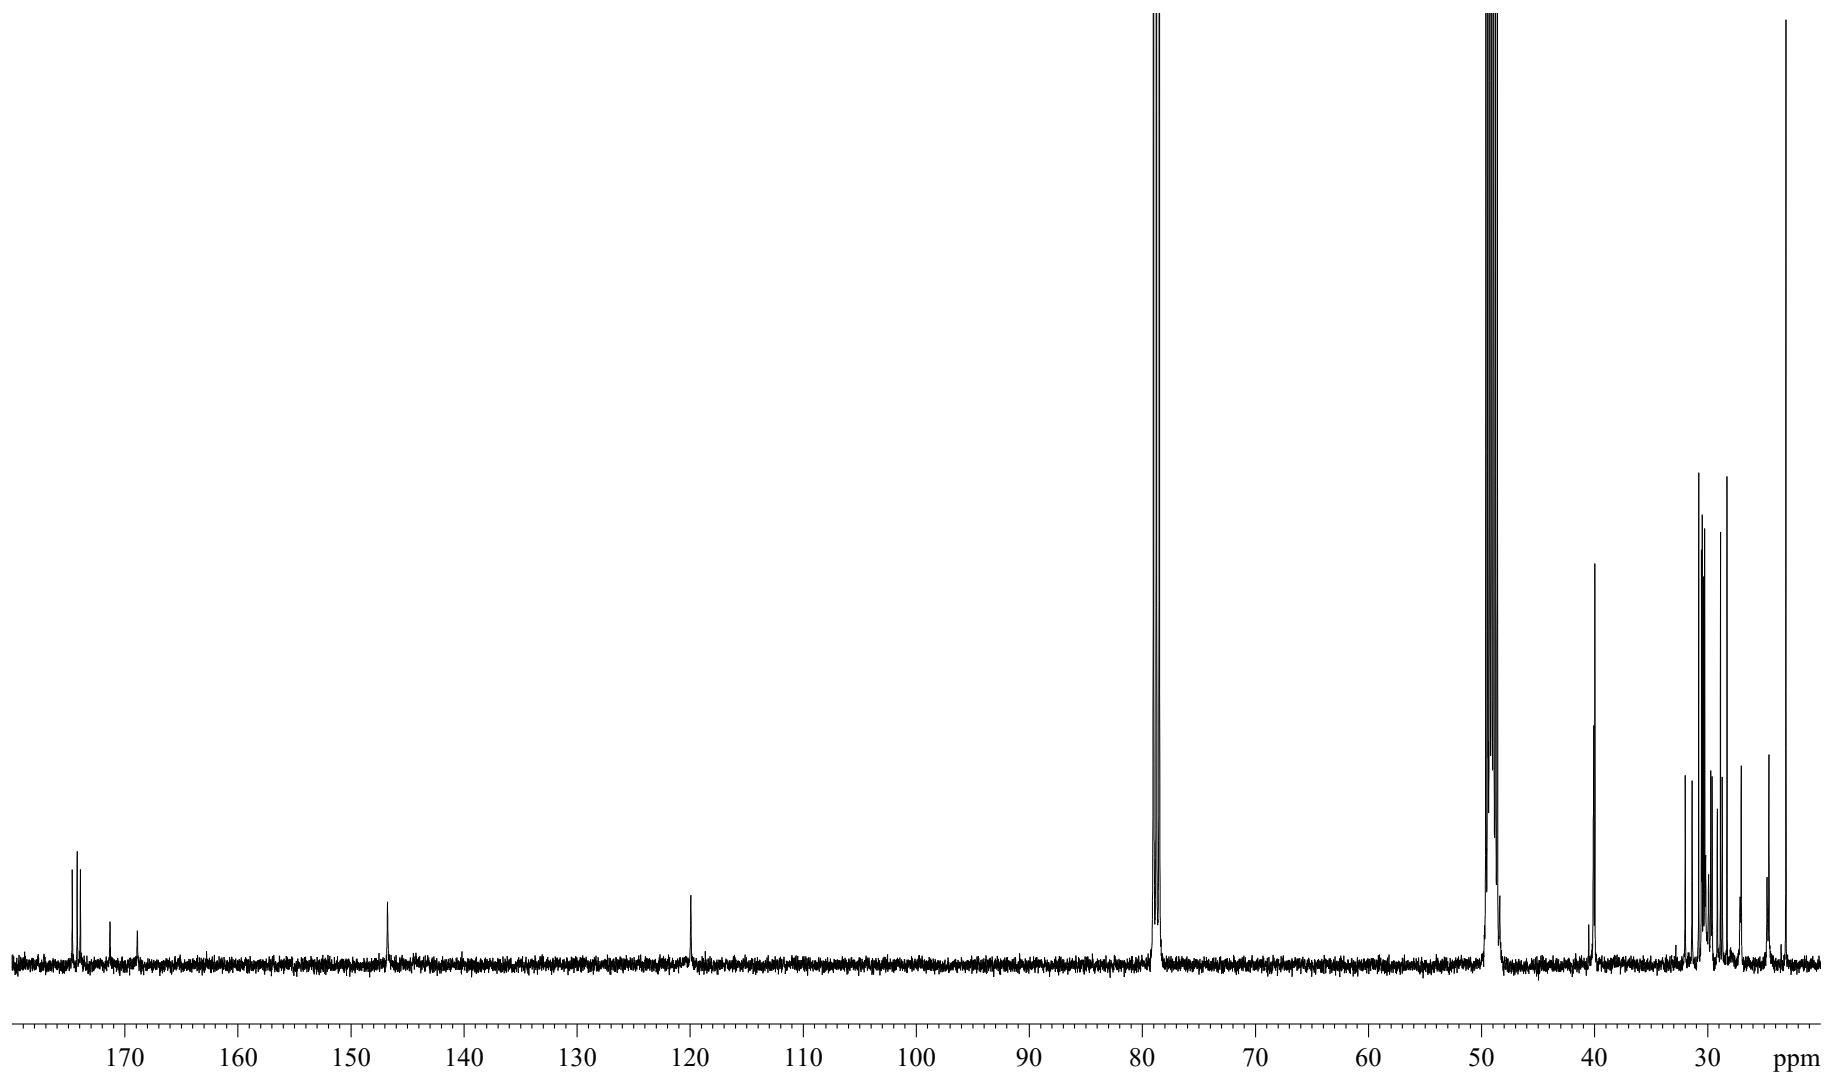

**Figure S10:**  $^{13}\text{C}$  NMR spectrum of **1** (125 MHz,  $\text{CDCl}_3/\text{CD}_3\text{OD}$  3:7, 25 °C).

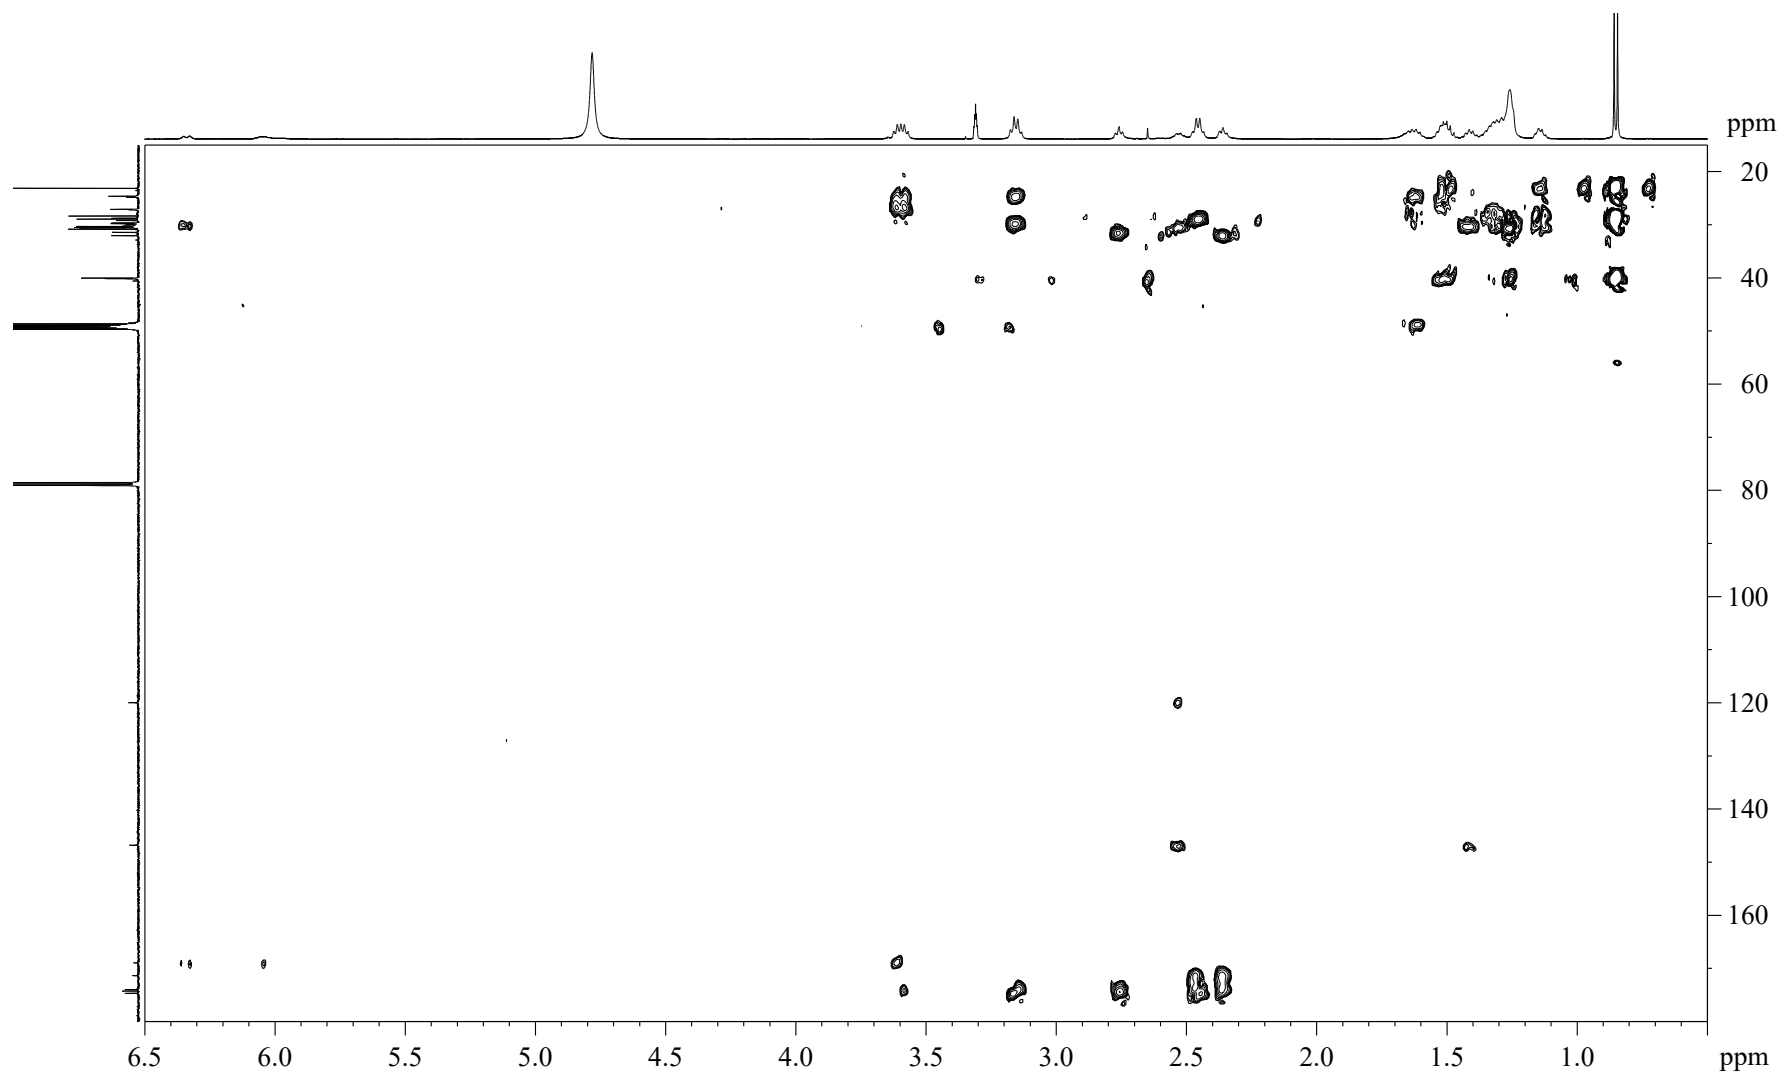

Figure S11: HMBC spectrum of **1** (500 MHz, CDCl<sub>3</sub>/CD<sub>3</sub>OD 3:7, 25 °C).

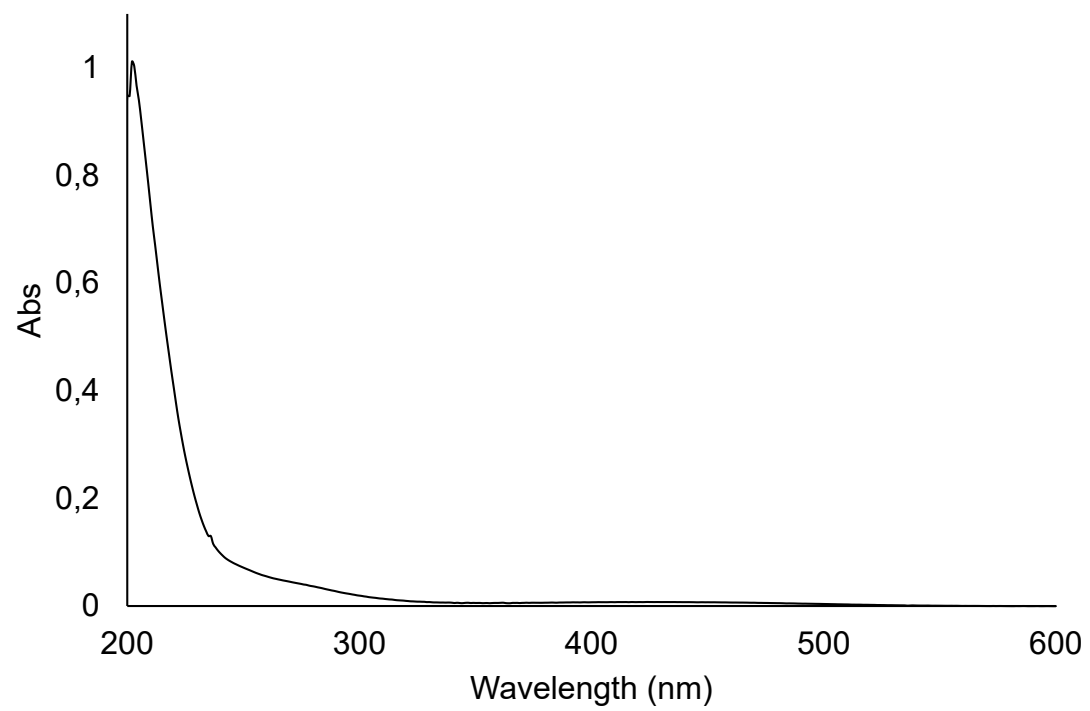

**Figure S12:** UV spectrum of tenacibactin L (2).

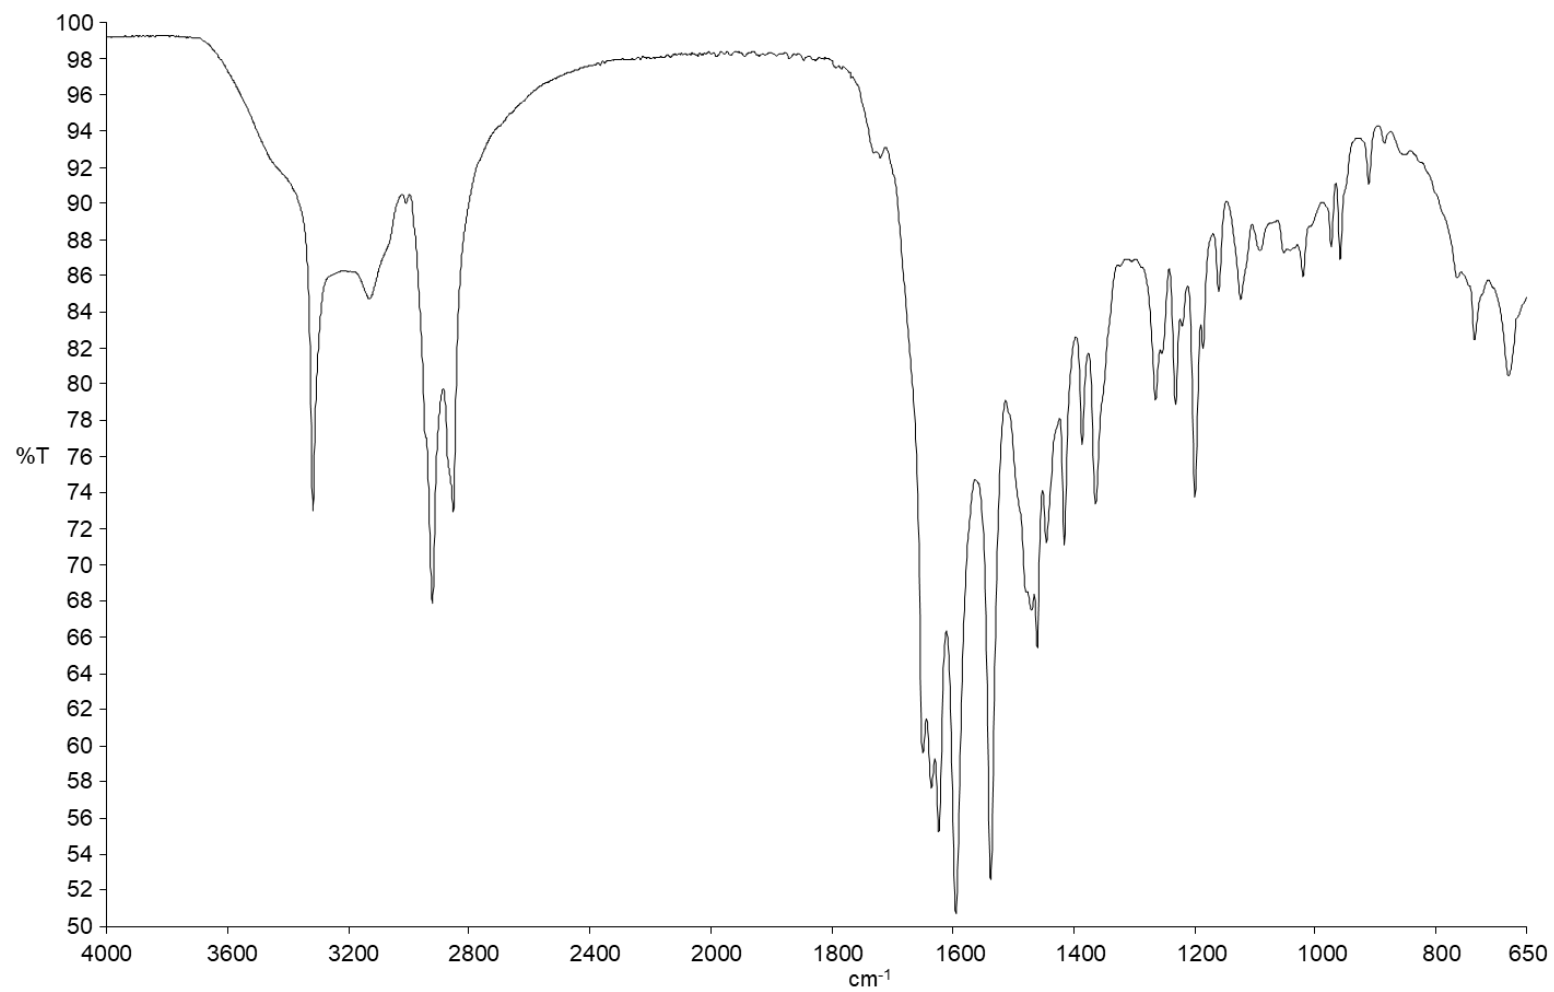

Figure S13: IR spectrum of 2.

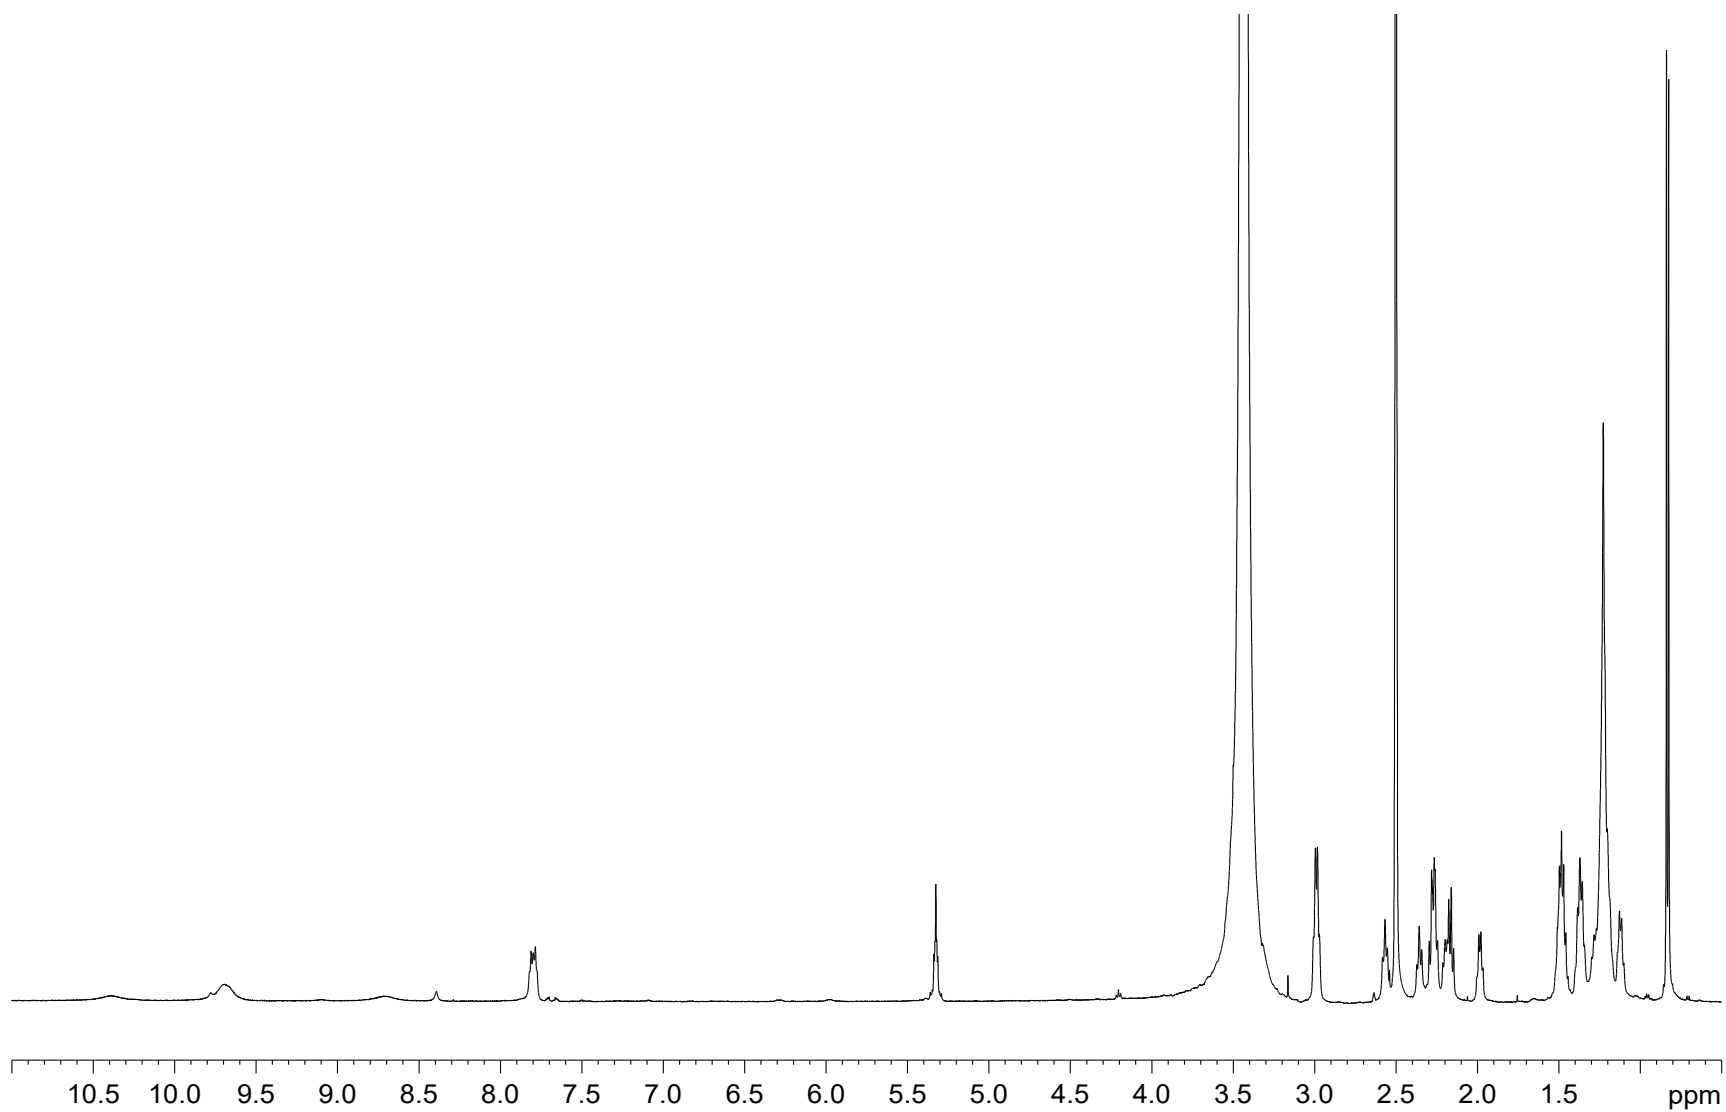

**Figure S14:**  $^1\text{H}$  NMR spectrum of **2** (500 MHz,  $\text{DMSO-}d_6$ , 25 °C).



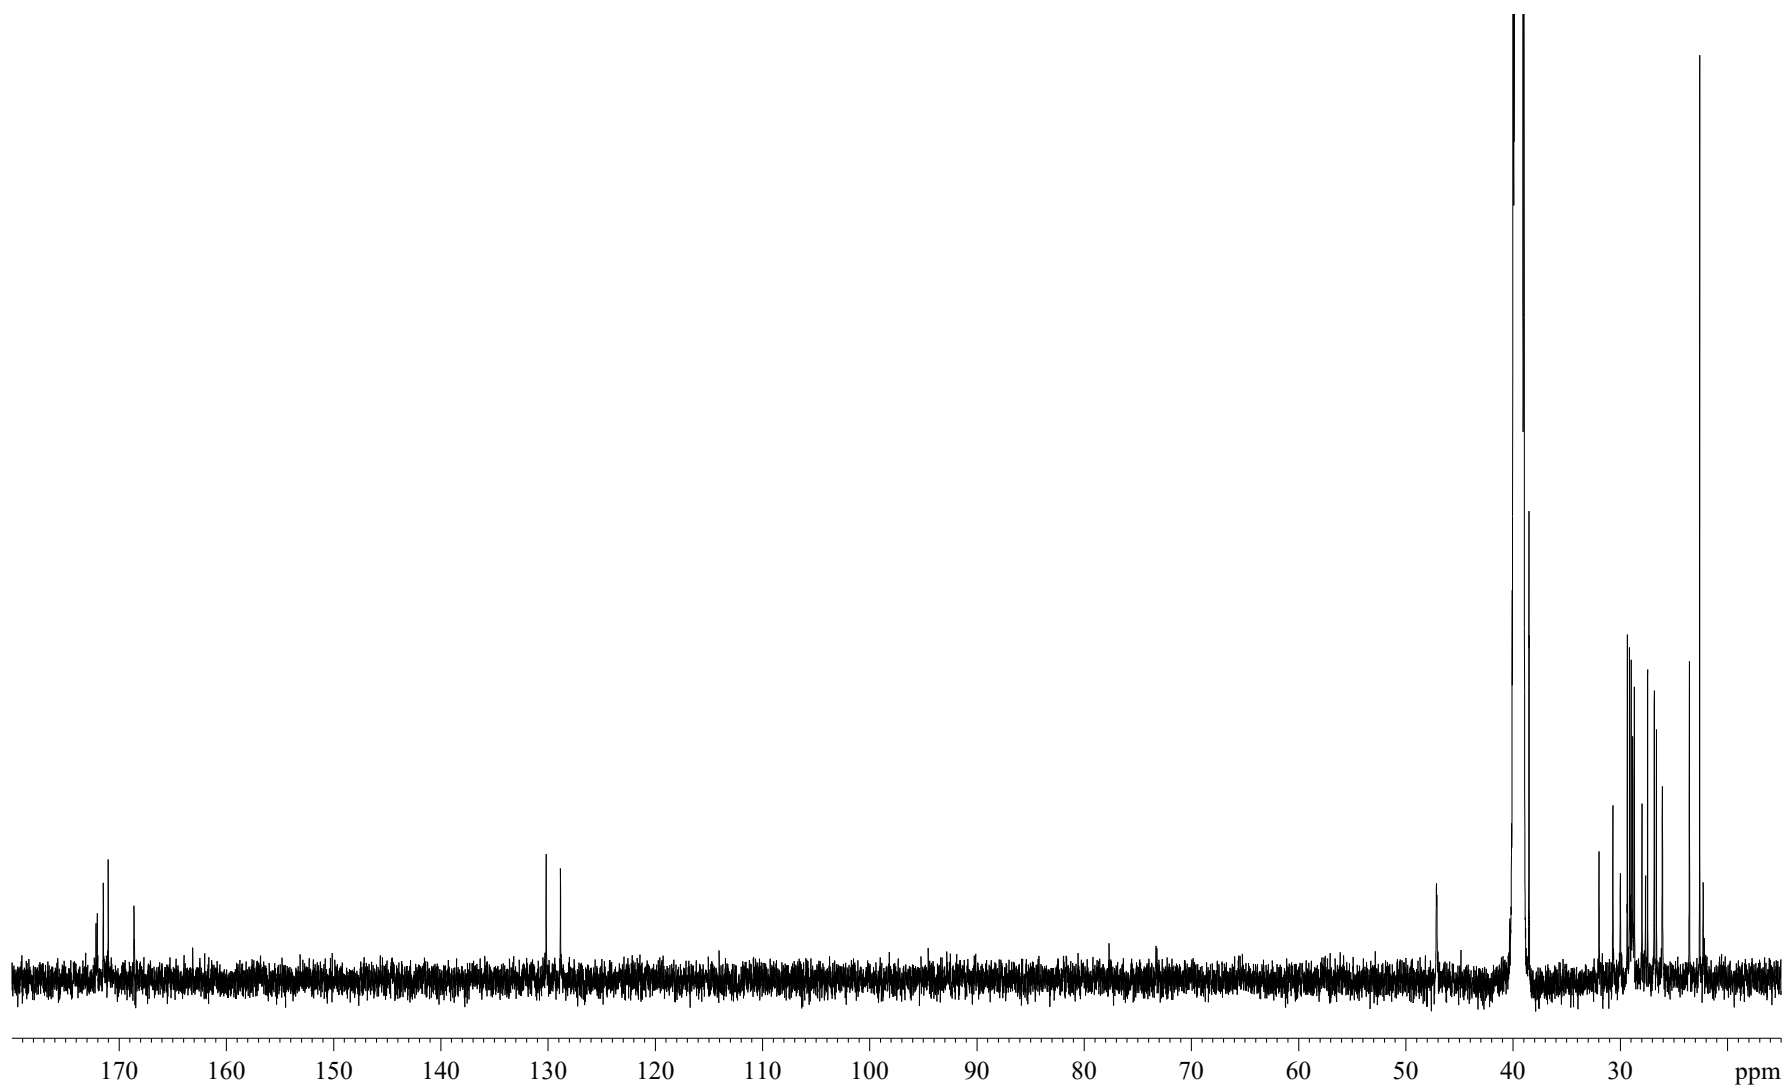

**Figure S15:**  $^{13}\text{C}$  NMR spectrum of **2** (125 MHz,  $\text{DMSO-}d_6$ , 25  $^\circ\text{C}$ ).

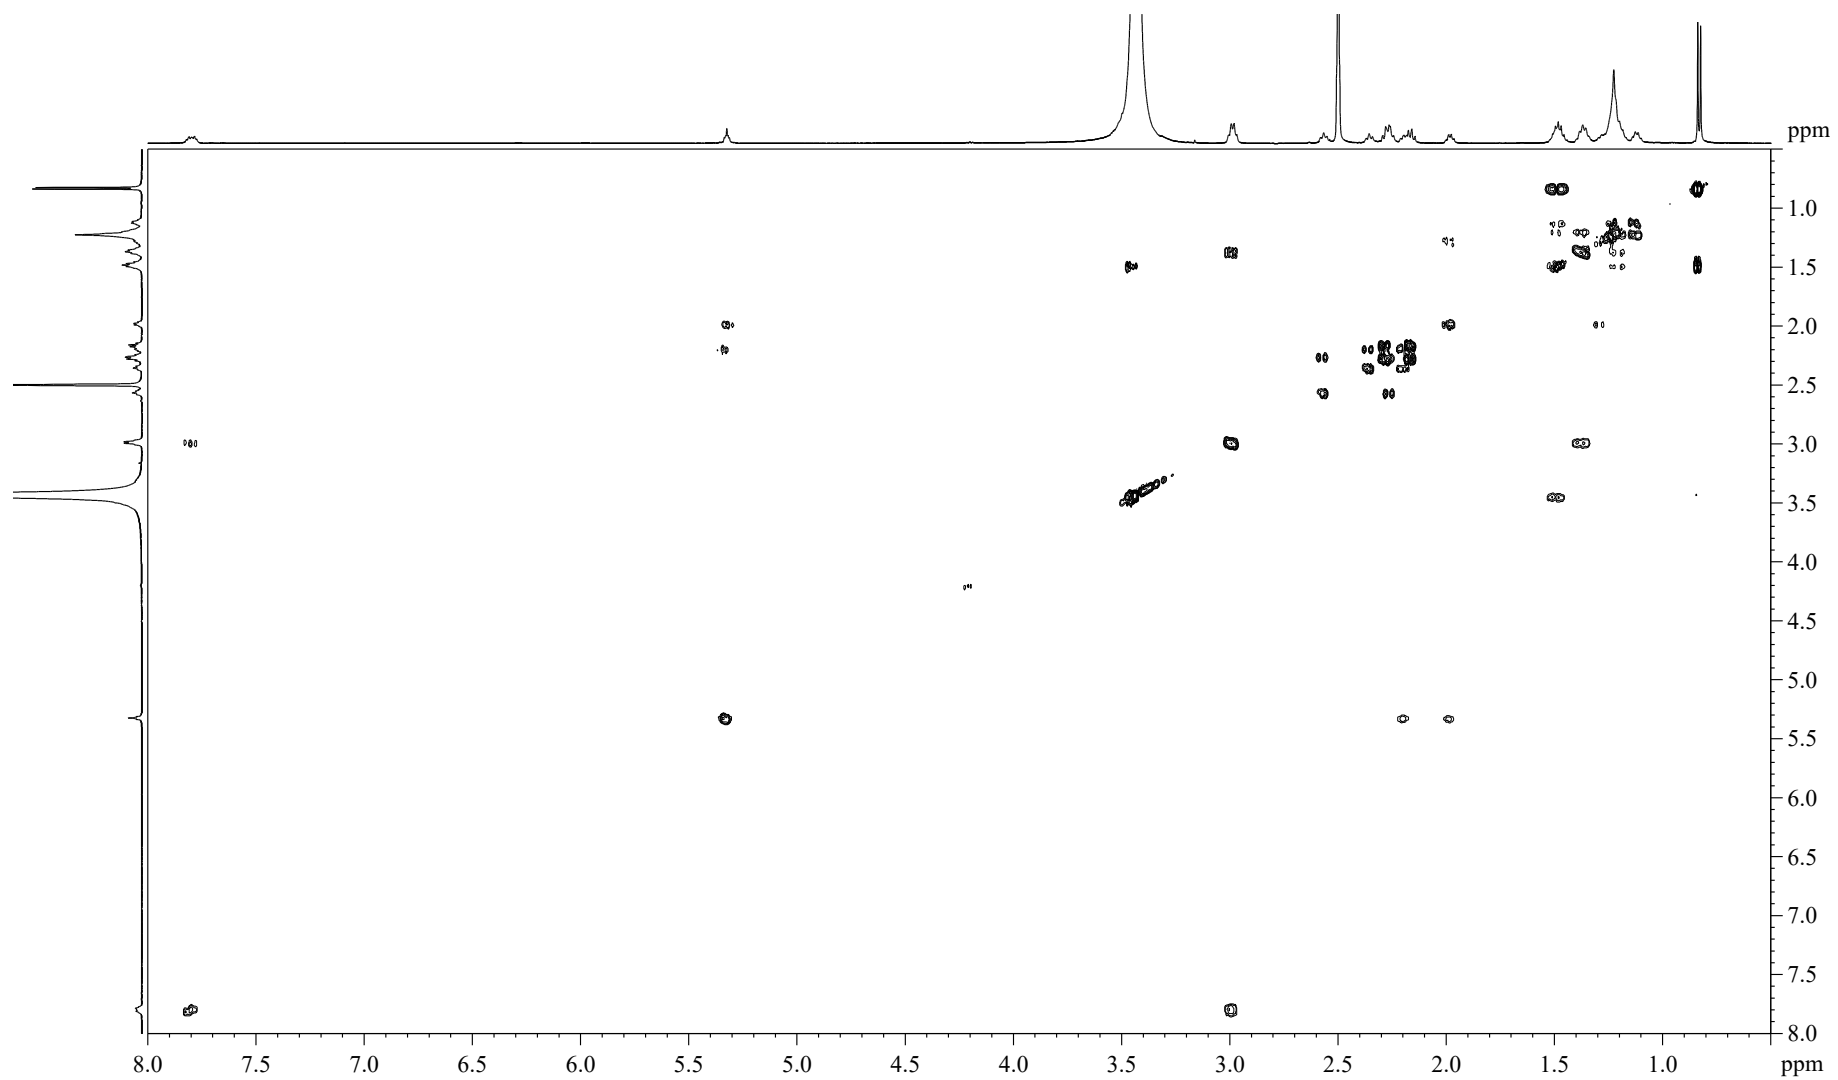

**Figure S16:** COSY spectrum of **2** (500 MHz, DMSO- $d_6$ , 25 °C).

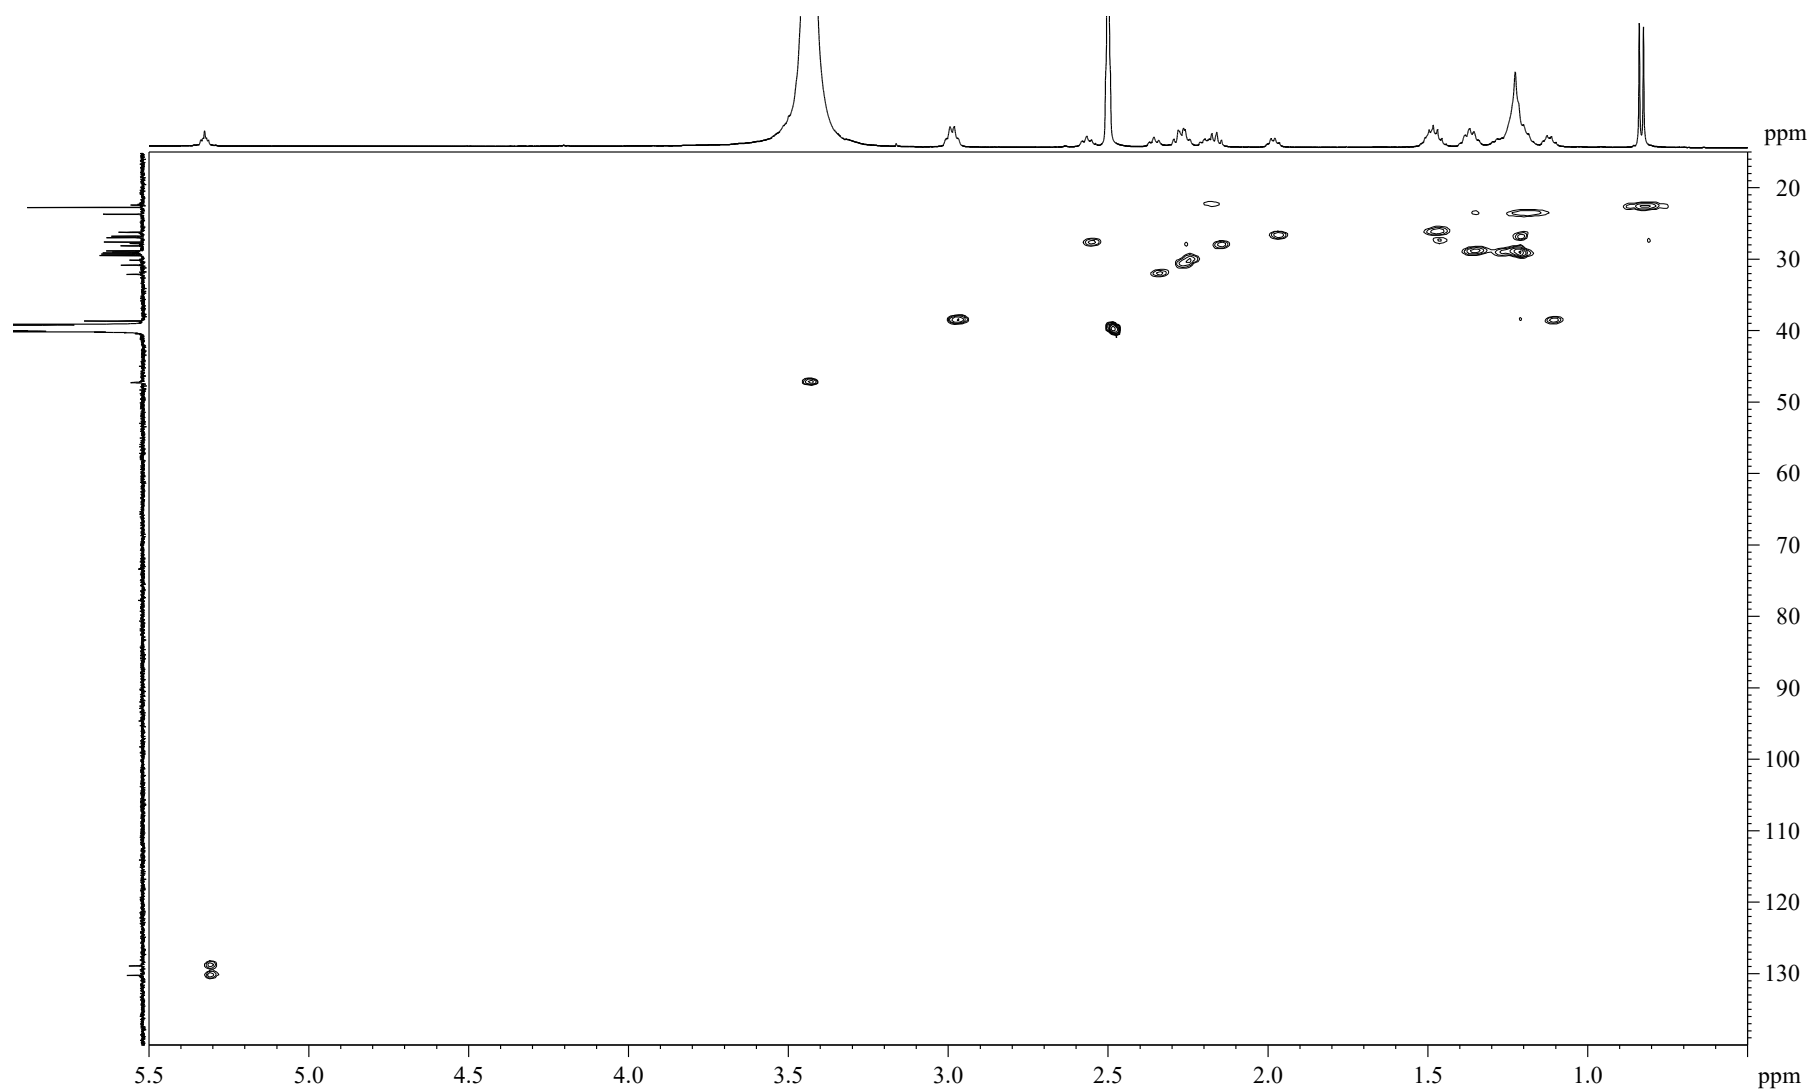

Figure S17: HSQC spectrum of **2** (500 MHz,  $\text{DMSO-}d_6$ , 25 °C).

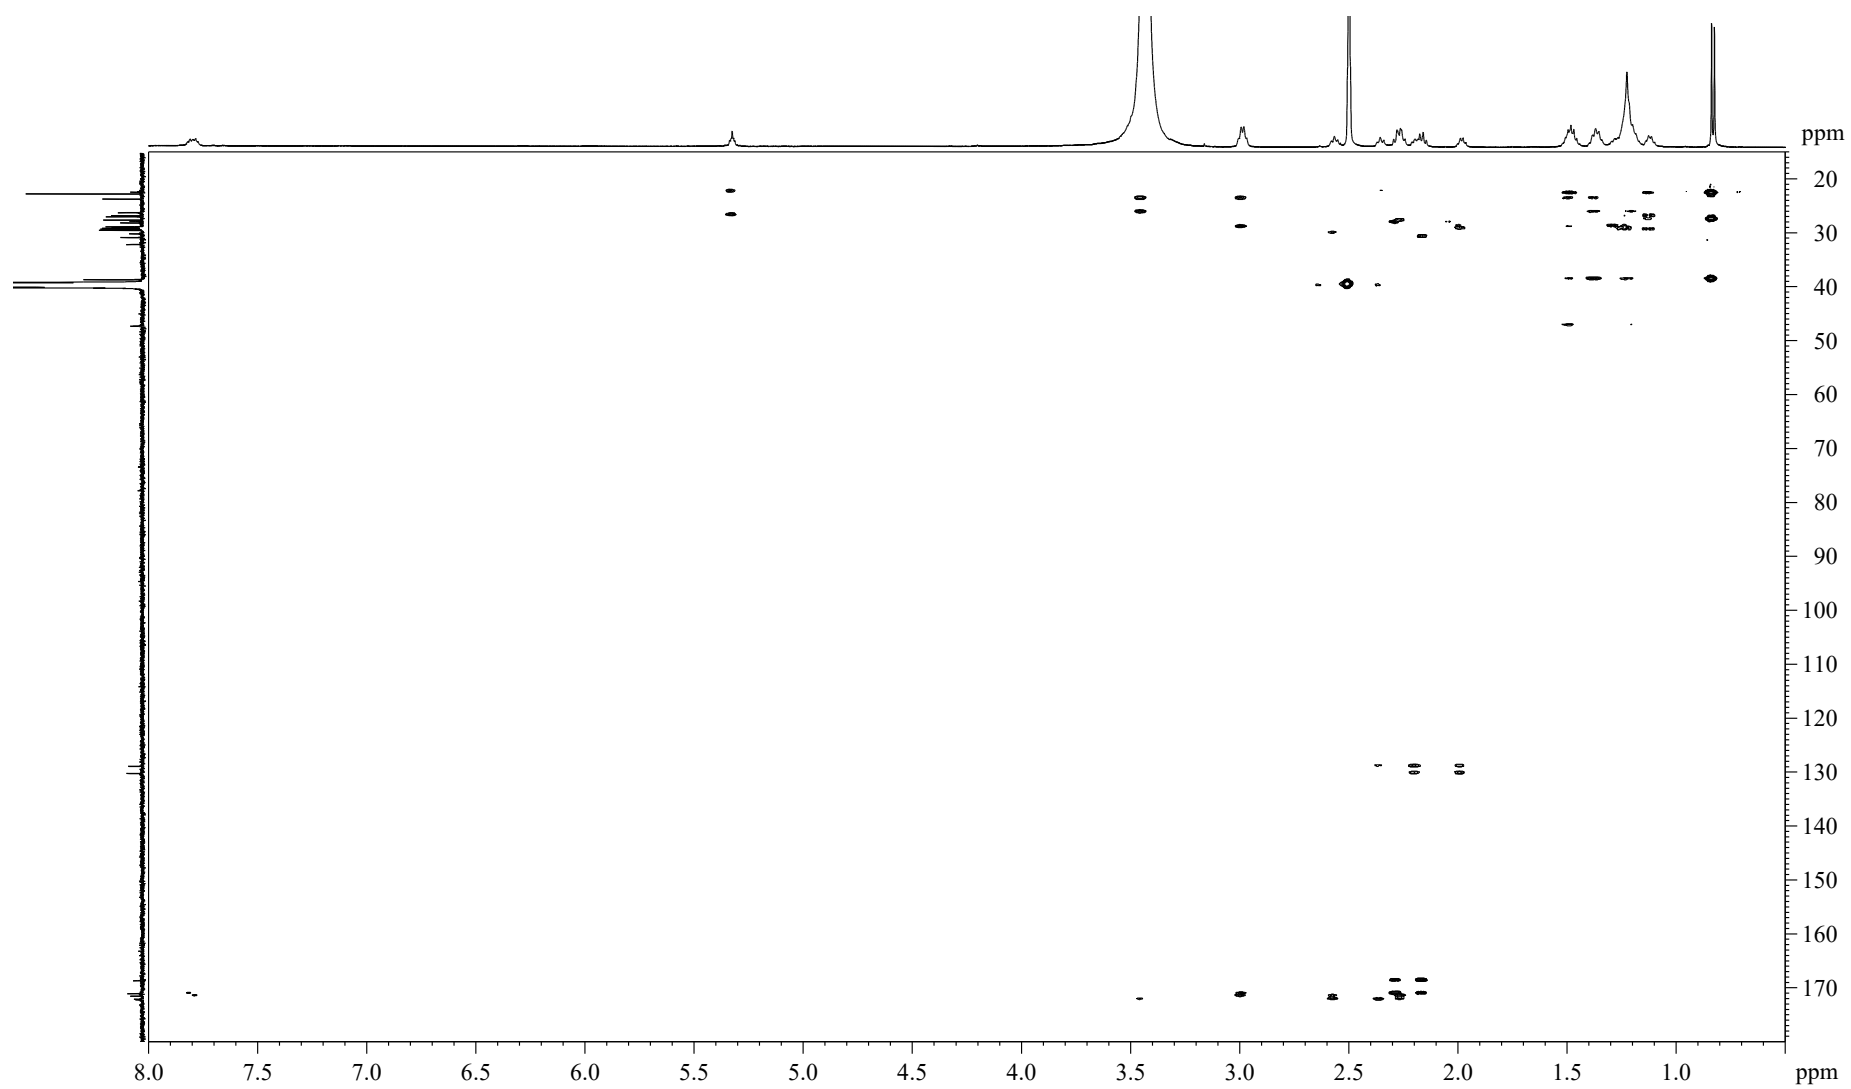

Figure S18: HMBC spectrum of **2** (500 MHz, DMSO-*d*<sub>6</sub>, 25 °C).

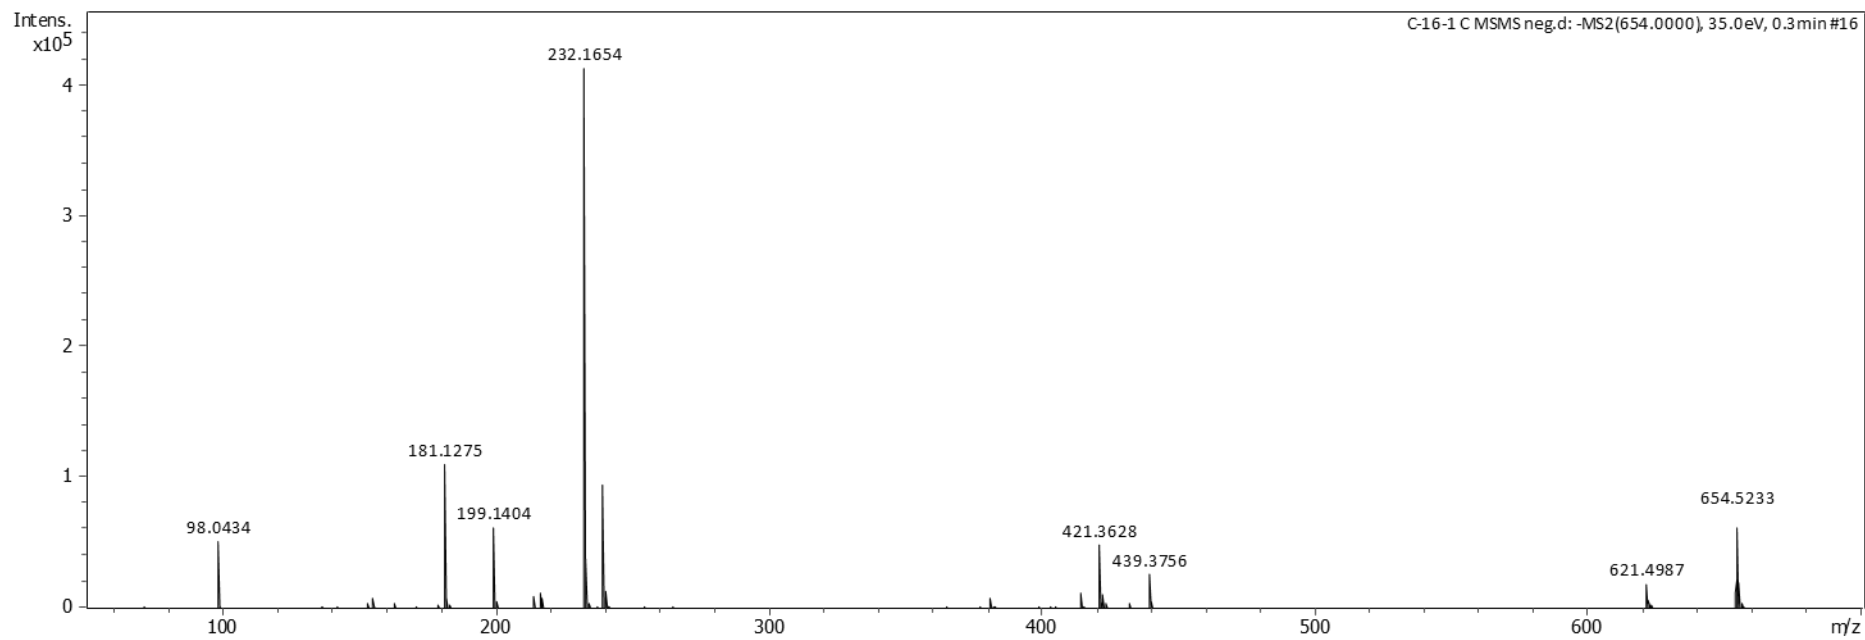

**Figure S19:** MS/MS spectrum of **2**.

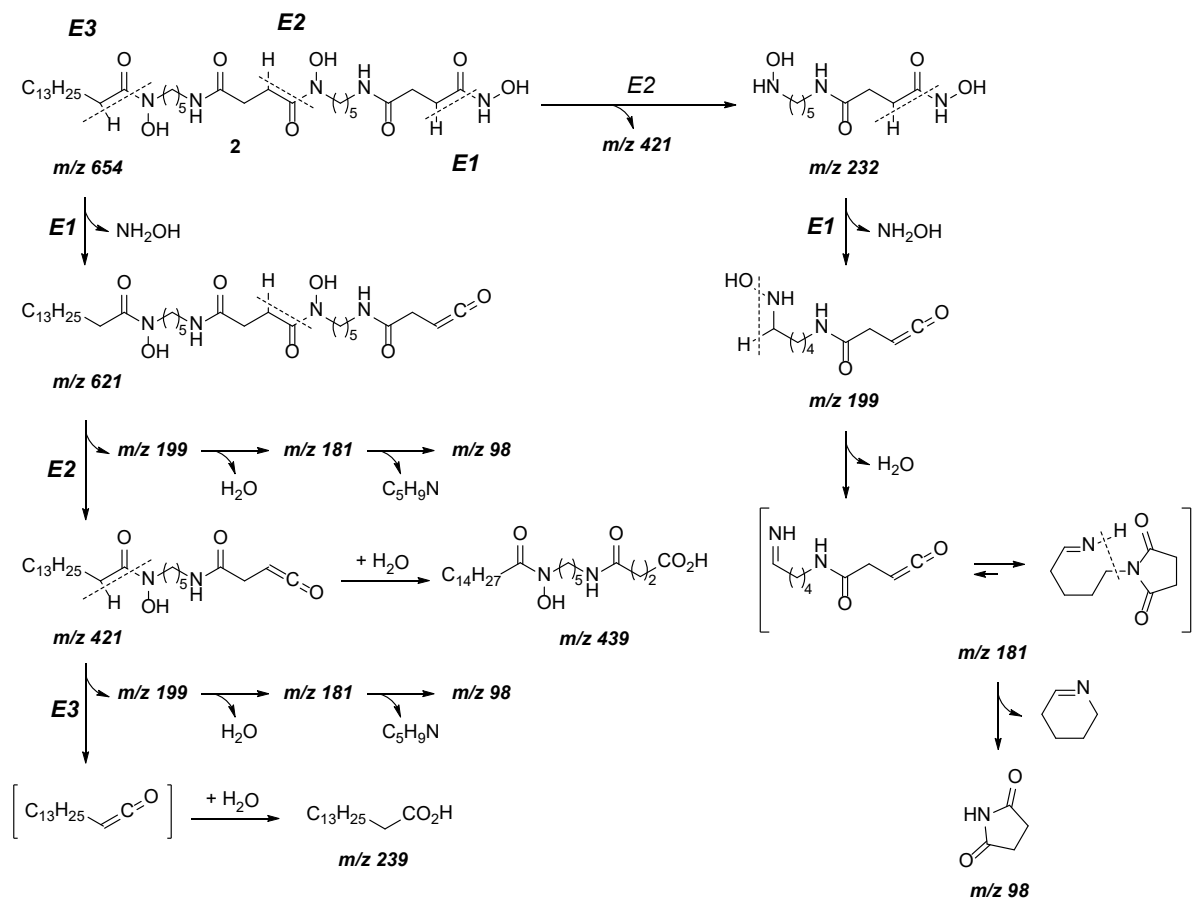

**Scheme S20:** Fragmentation pathway for **2**.

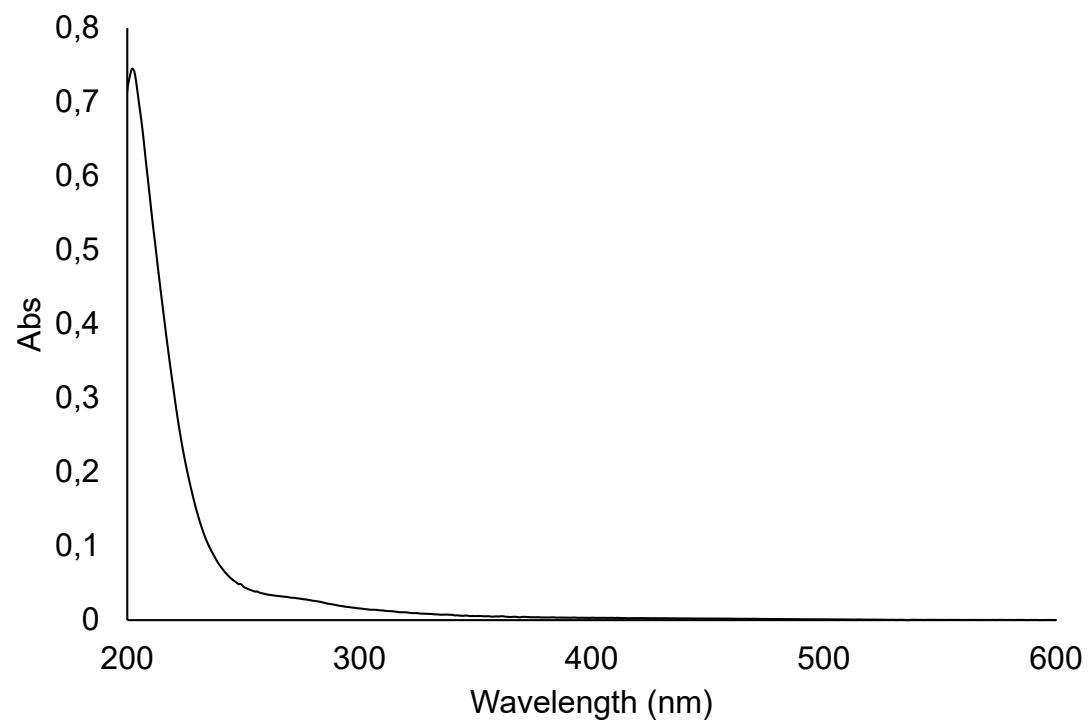

**Figure S21:** UV spectrum of tenacibactin M (**3**).

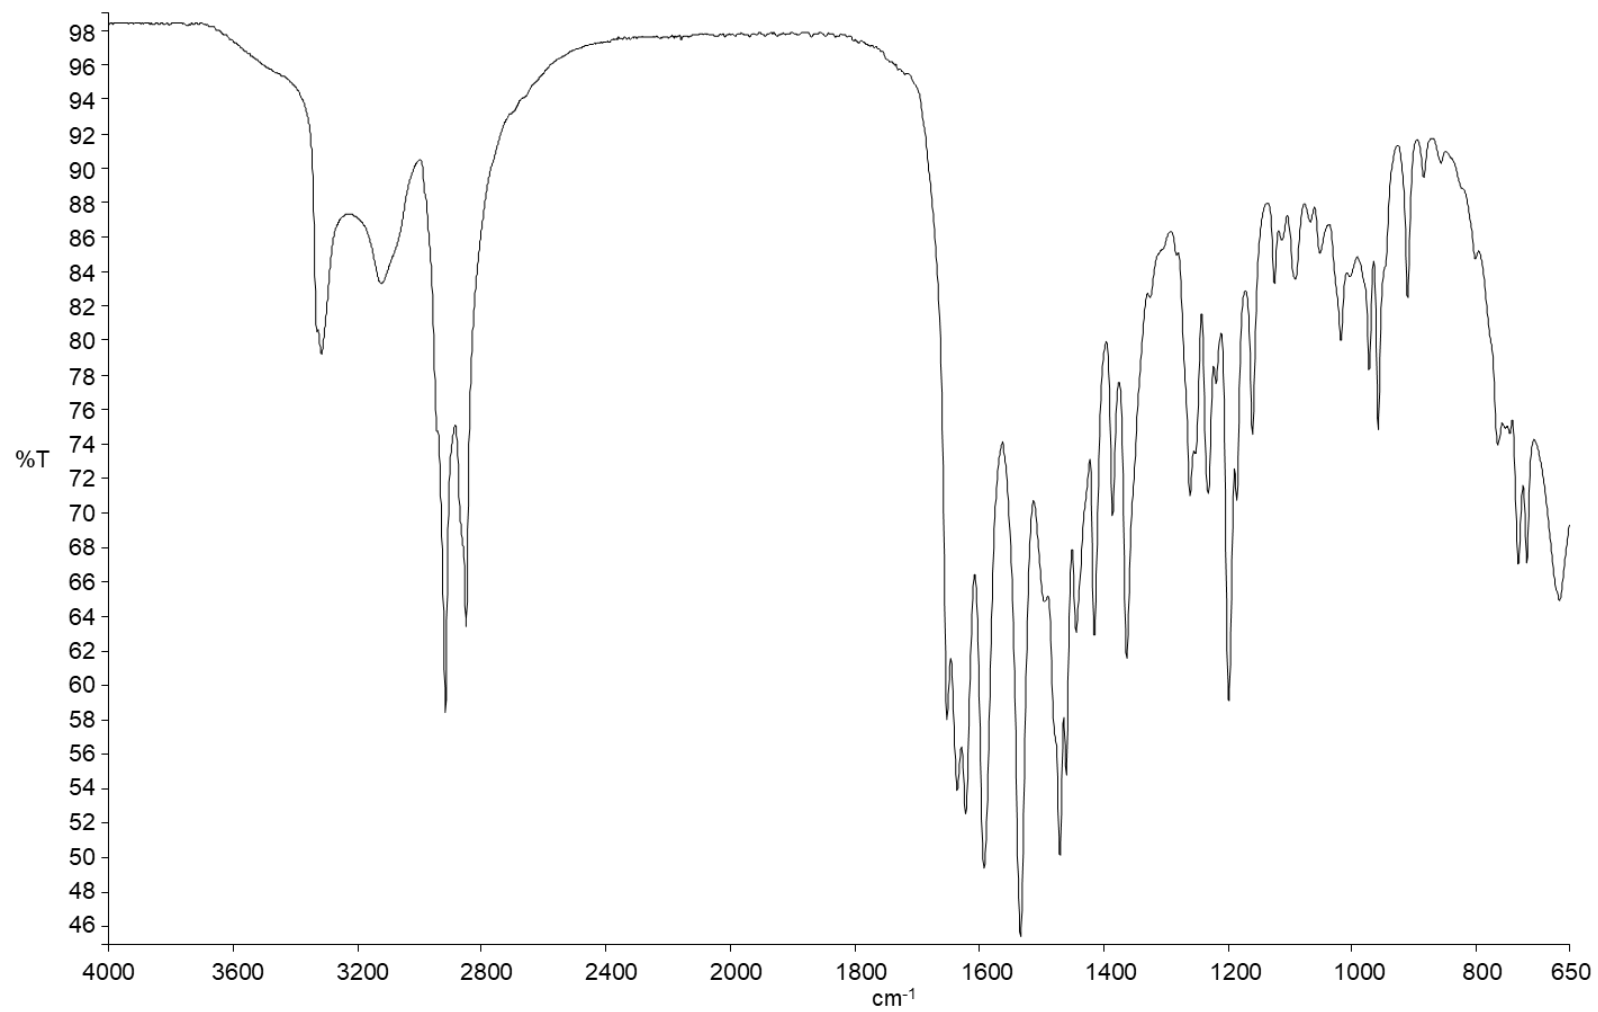

**Figure S22:** IR spectrum of **3**.



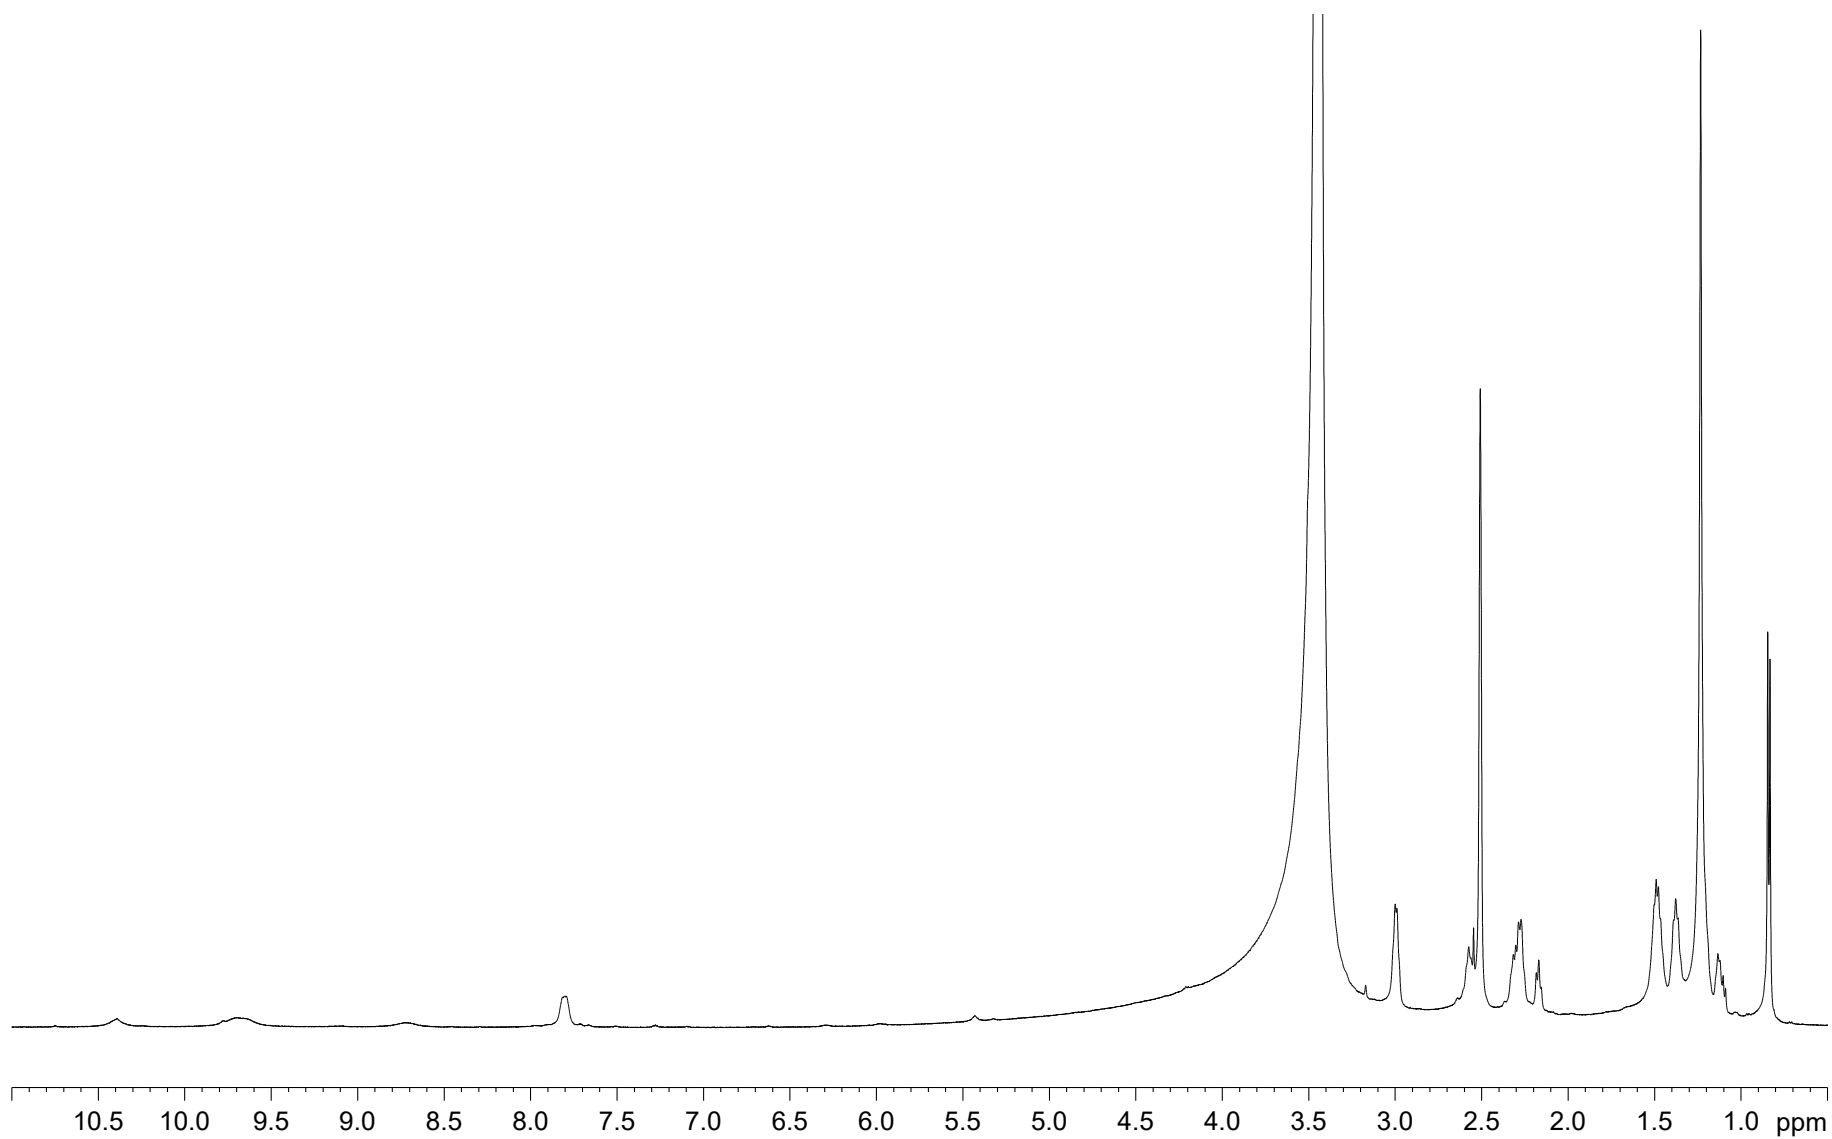

**Figure S23:**  $^1\text{H}$  NMR spectrum of **3** (500 MHz,  $\text{DMSO}-d_6$ , 25 °C).

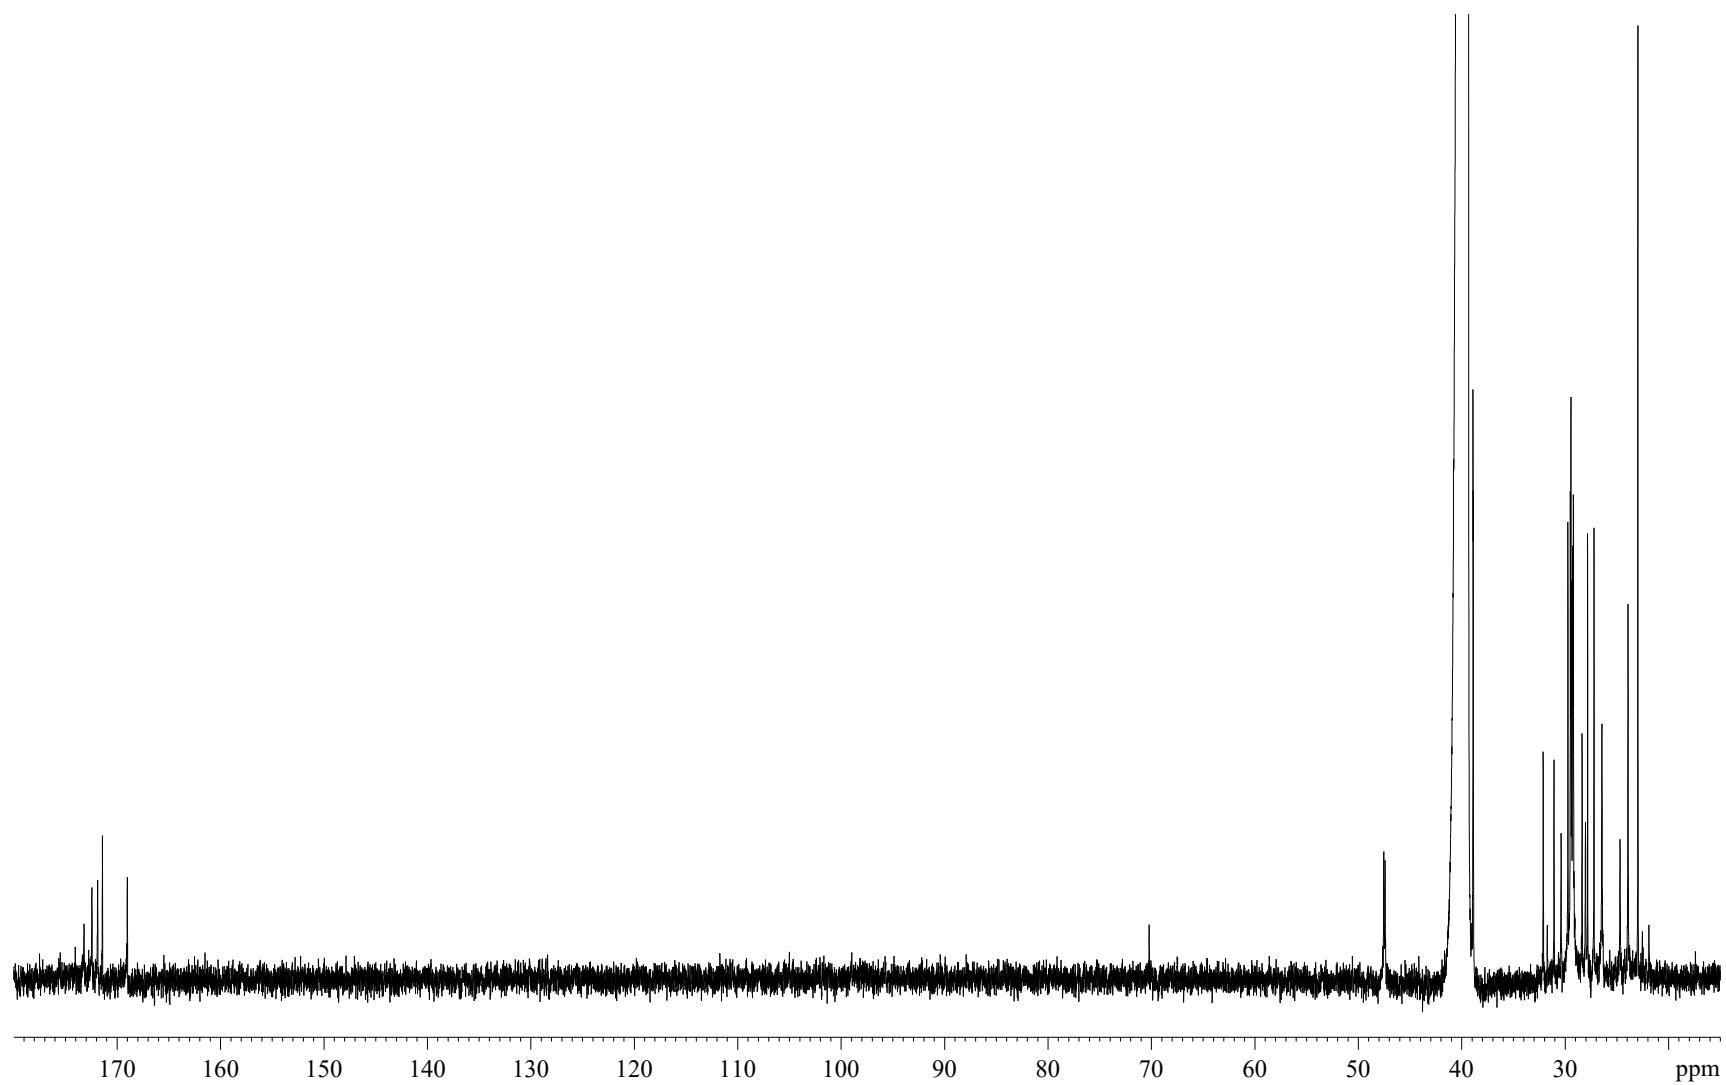

**Figure S24:**  $^{13}\text{C}$  NMR spectrum of **3** (125 MHz,  $\text{DMSO-}d_6$ , 25 °C).

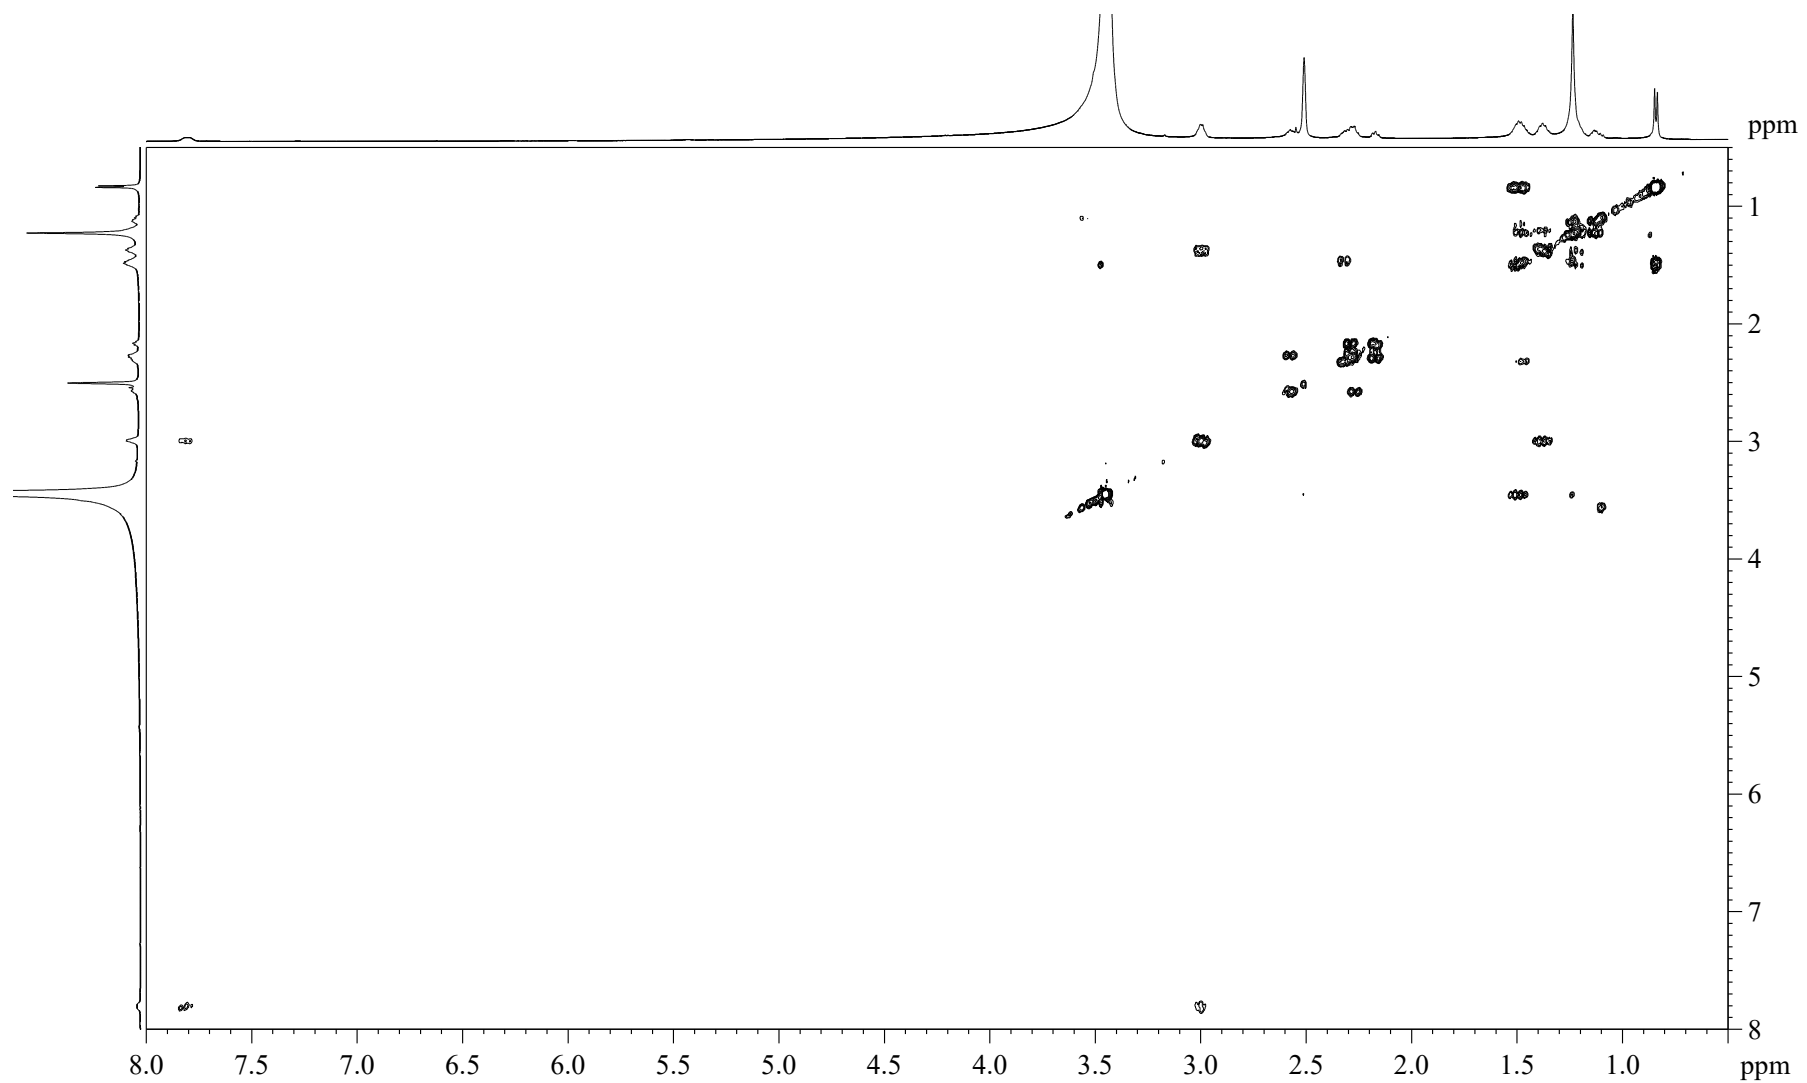

**Figure S25:** COSY spectrum of **3** (500 MHz, DMSO-*d*<sub>6</sub>, 25 °C).

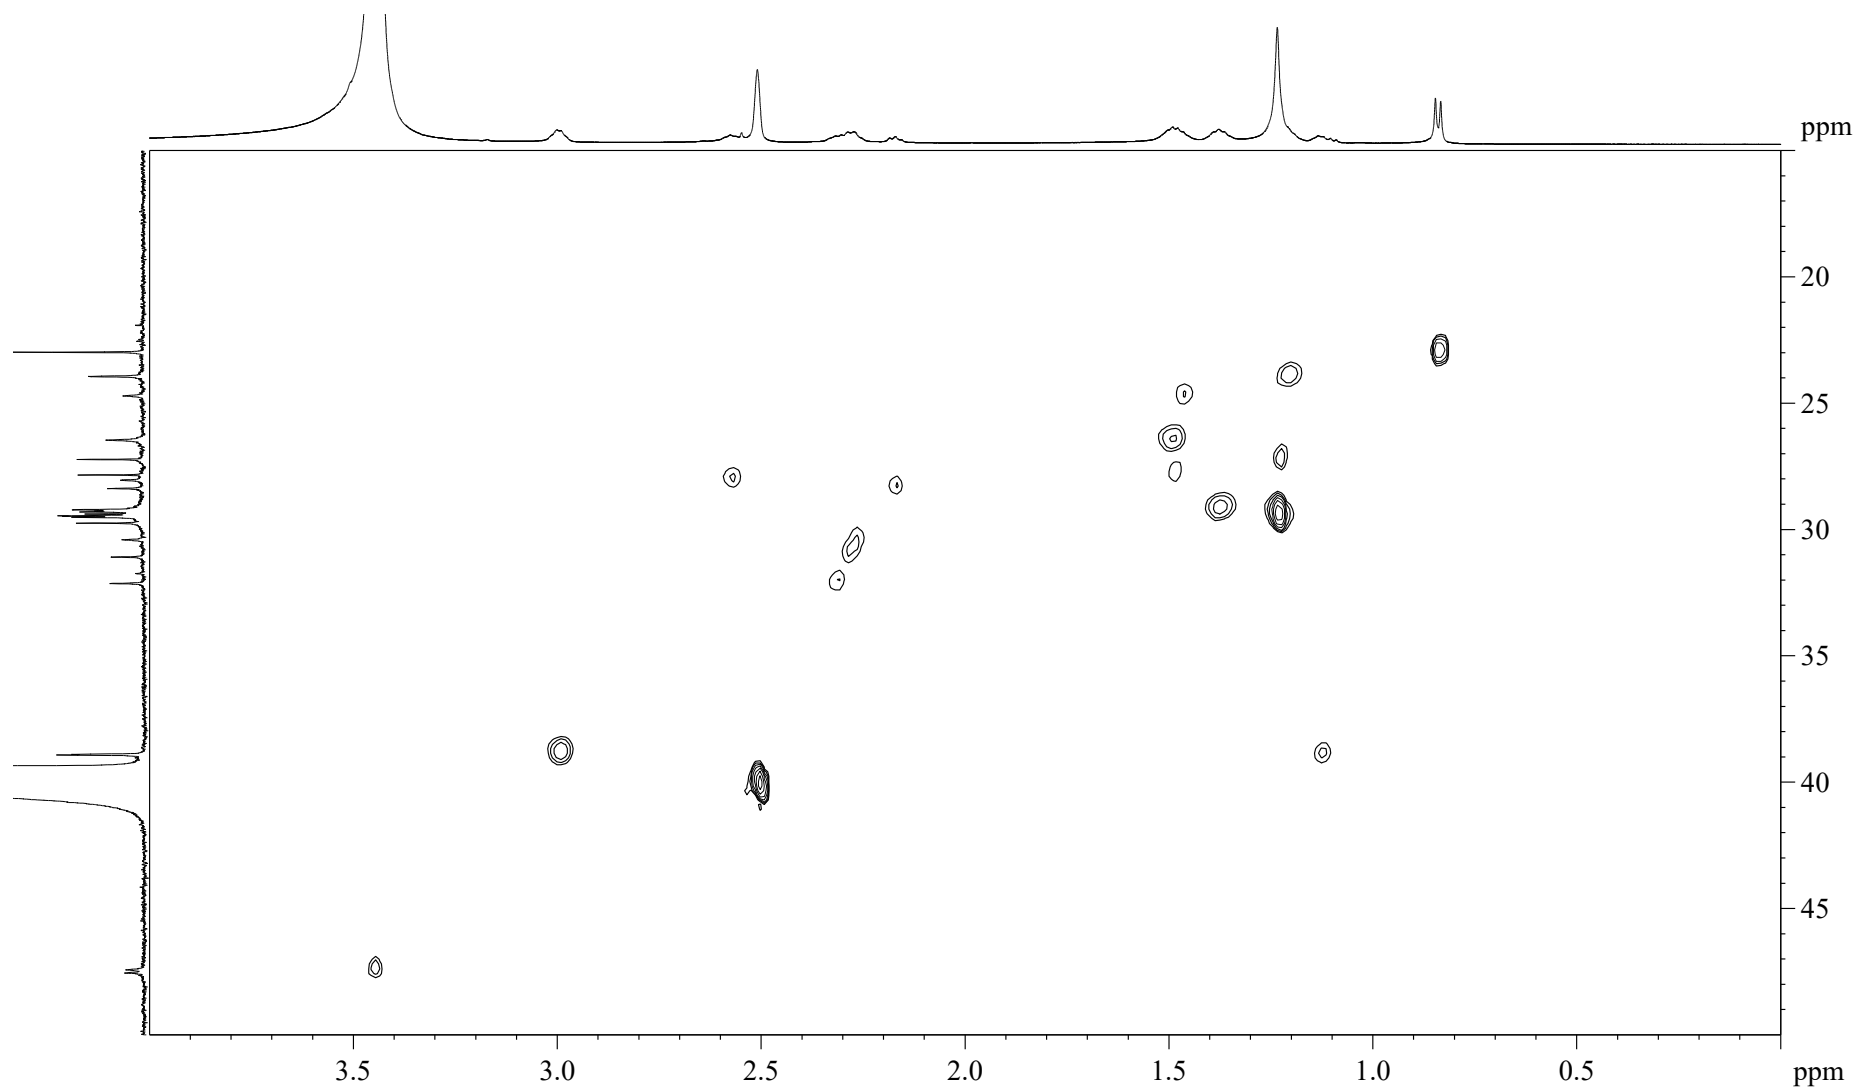

**Figure S26:** HSQC spectrum of **3** (500 MHz,  $\text{DMSO-}d_6$ , 25 °C).

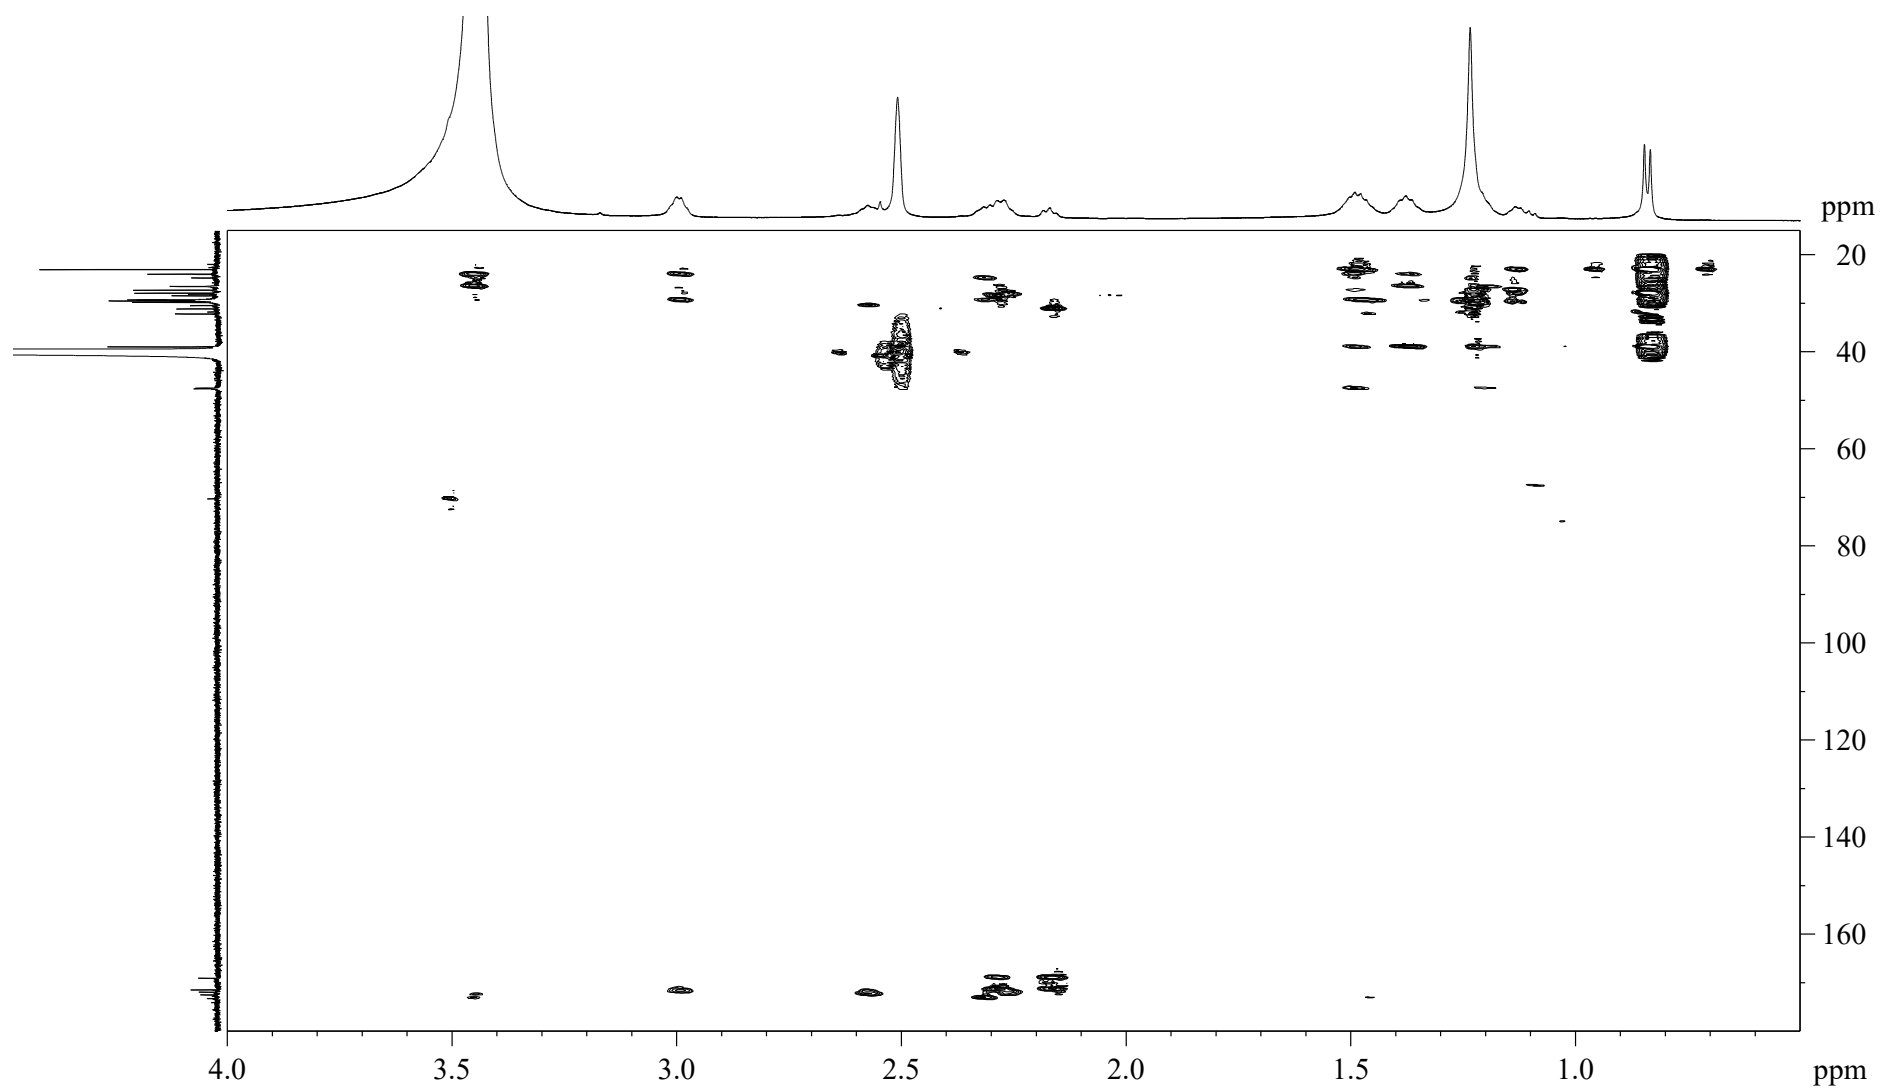

Figure S27: HMBC spectrum of **3** (500 MHz,  $\text{DMSO-}d_6$ , 25 °C).

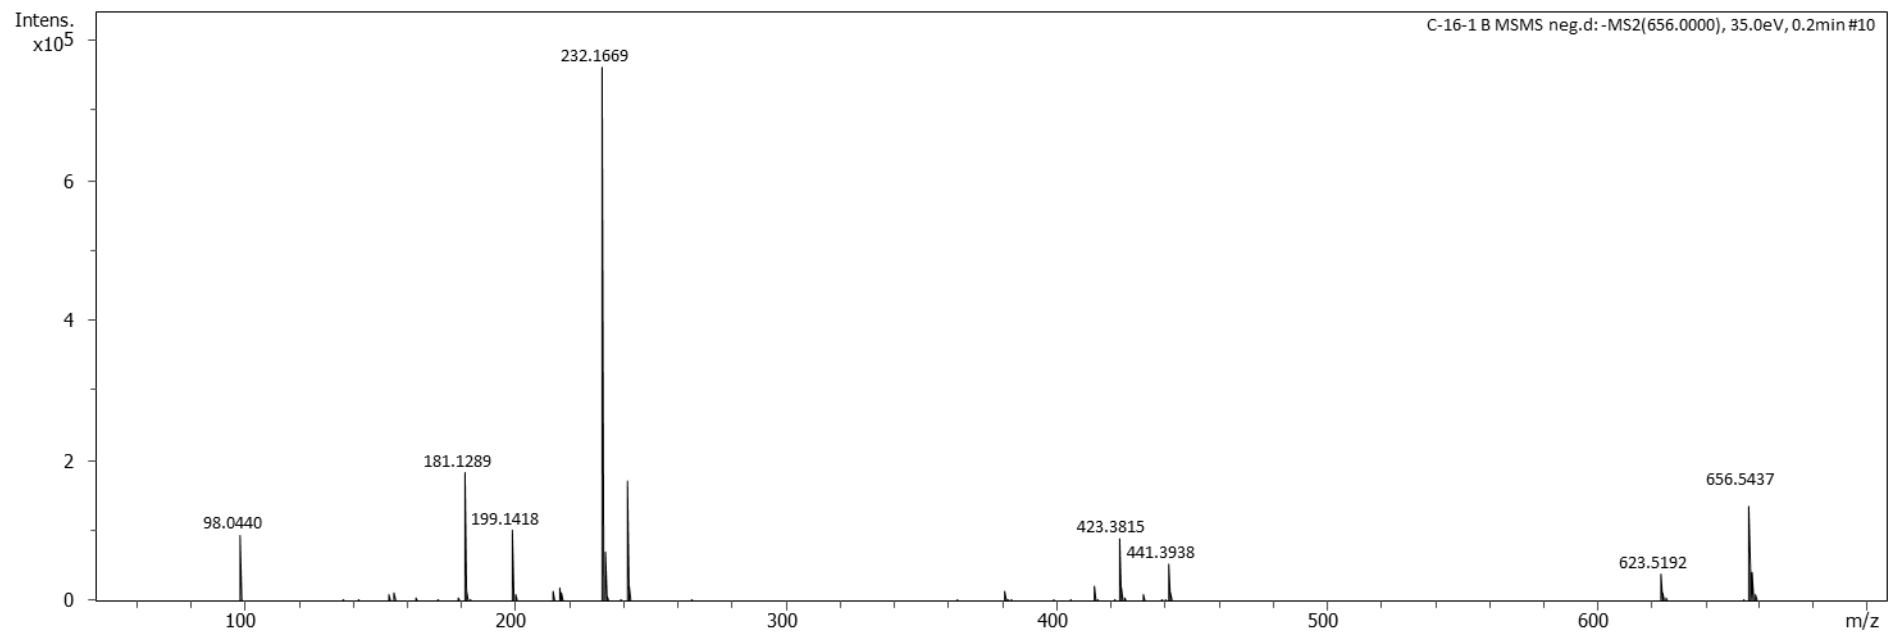

**Figure S28:** MS/MS spectrum of **3**.

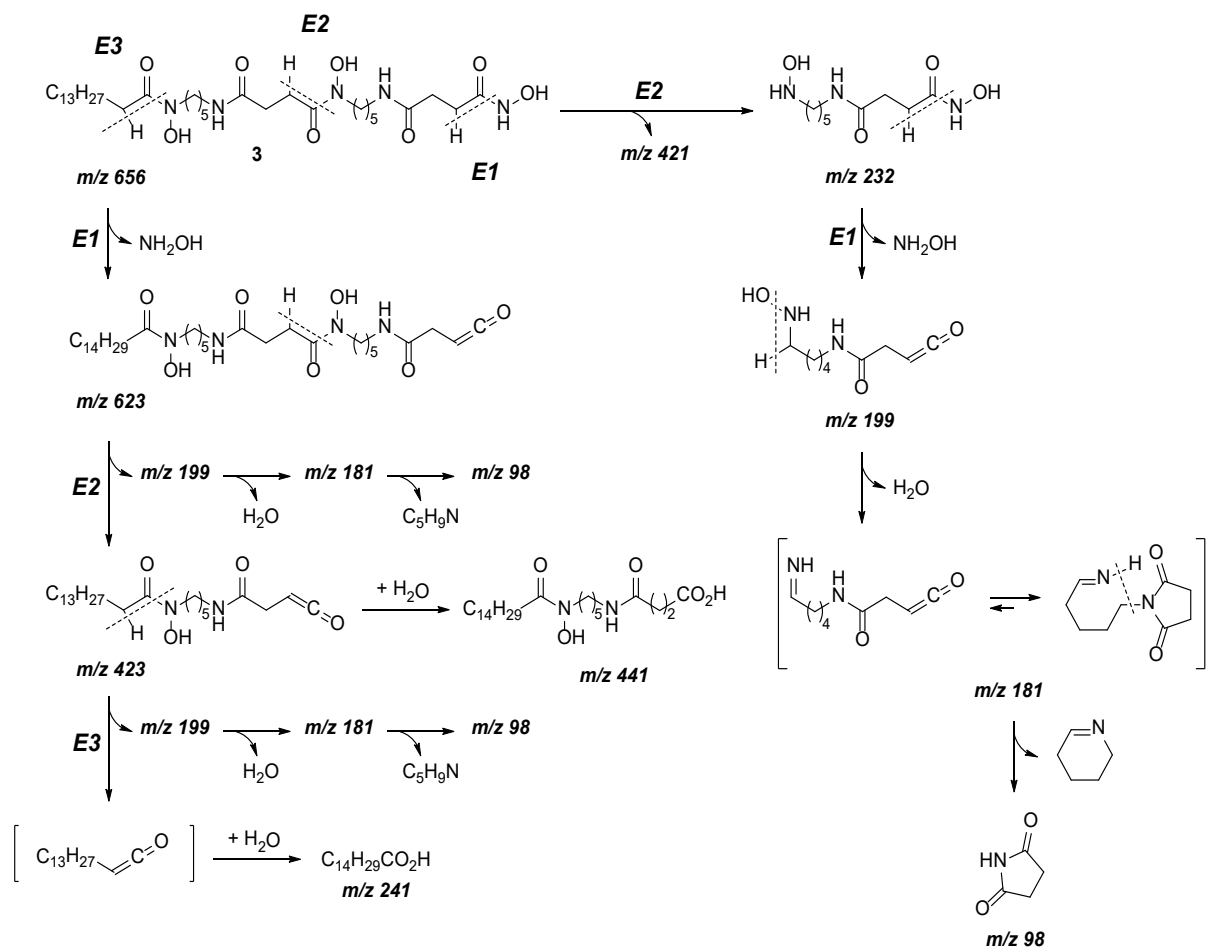

**Scheme S29:** Fragmentation pathway for **3**.
